# 1 Binding the acoustic features of an 2 auditory source through temporal 3 coherence

4 Mohsen Rezaeizadeh<sup>1\*</sup> and Shihab Shamma<sup>1,2\*</sup>

\*For correspondence:

[sas@umd.edu](mailto:sas@umd.edu) (SS);

[mohsenr@umd.edu](mailto:mohsenr@umd.edu) (MR)

5 <sup>1</sup>Institute for Systems Research & Department of Electrical and Computer Engineering,  
6 University of Maryland, College Park, United States; <sup>2</sup>Département d'études cognitive,  
7 Ecole Normale Supérieure, Paris, France

8 

---

9 **Abstract** Numerous studies have suggested that the perception of a target sound source can  
10 only be segregated from a complex acoustic background if the acoustic features underlying its  
11 perceptual attributes (e.g., pitch, location, and timbre) induce temporally modulated responses  
12 that are mutually correlated, and that are uncorrelated from those of other sources in the mixture.  
13 This "temporal coherence" hypothesis asserts that listening attentively to one or a subset of at-  
14 tributes of a target source enhances their neural responses and concomitantly enhances all other  
15 coherent responses, thus binding them together while simultaneously suppressing the incoherent  
16 responses to the background features. Here we report on EEG measurements in human subjects  
17 engaged in various sound segregation tasks that demonstrate rapid binding among the temporally  
18 coherent features of the attended source regardless of their identity, harmonic relationship, or fre-  
19 quency separation, thus confirming the key role temporal coherence plays in the organization of  
20 auditory scenes.

## 21 ---

### 22 Introduction

23 Humans and other animals can segregate a target sound from background interference and noise  
24 with remarkable ease (*Bregman, 1990; Moore and Gockel, 2002; Middlebrooks et al., 2017*), despite  
25 the highly interleaved spectrotemporal acoustic components of the different sound sources (or  
26 streams) (*Brungart et al., 2001*). It is hypothesized that attention is important for this process  
27 to occur in a listener's brain, and that the consistent or *coherent* temporal co-modulation of the  
28 acoustic features of the target sound, and their incoherence from those of other sources, are the  
29 two key factors that induce the binding of the target features and its emergence as the foreground  
30 sound source (*Lu et al., 2017; Shamma et al., 2011; Elhilali et al., 2009*). Specifically, the *temporal*  
31 *coherence principle* implies that acoustic features underlying the perceptual attributes of a sound  
32 emanating from a single source (e.g., its pitch, timbre, location, loudness) evoke correlated neural

33 responses, i.e., that fluctuate similarly in power over time, and that the attentive listener tracks  
34 and utilizes this neural coherence to extract and perceive the source. The definition of temporal  
35 coherence and other related terms is further elaborated upon in the Methods *section* .

36 Numerous studies have provided insights into the temporal coherence theory and tested its  
37 predictions. For example, psychoacoustic experiments have shown that perception of synchronous  
38 tone sequences as belonging to a single stream is not appreciably affected by their frequency  
39 separation (from 3 semitones to over an octave) or small frequency fluctuations of the individual  
40 components, as long as the tones remain temporally coherent (*Micheyl et al., 2013a,b*). Further-  
41 more, it is far easier to detect the temporal onset misalignment between tones across two syn-  
42 chronized sequences, compared to between asynchronous (e.g., alternating) sequences (*Elhilali*  
43 *et al., 2009*), suggesting that temporally coherent tone sequences are perceived as a single stream  
44 (*Bregman and Campbell, 1971; Zera, 1993; Zera and Green, 1995*). Additional strong evidence for  
45 the temporal coherence principle was provided by a series of experiments utilizing the stochas-  
46 tic figure-ground stimulus, in which synchronous tones (referred to as the "figure") are found to  
47 pop out perceptually against a background of random desynchronized tones, with the perceptual  
48 saliency of the "figure" being proportional to the number of its coherent tones (*Teki et al., 2013,*  
49 *2016; O'Sullivan et al., 2015*).

50 To account for the neural bases underlying the principle of temporal coherence, a recent elec-  
51 trocorticography (ECoG) study in human patients examined the progressive extraction of attended  
52 speech in a multi-talker scenario. It demonstrated that a linear mapping could transform the multi-  
53 talker responses in the human primary auditory cortex (Heschl's Gyrus, or HG, in humans) to those  
54 of the attended speaker in higher auditory areas. Furthermore, the mapping weights could be read-  
55 ily predicted by the mutual correlation, or *temporal correlation* between the responses in the HG  
56 sites (*O'Sullivan et al., 2019*). This experimental finding is consistent with an earlier computational  
57 model for how temporal coherence could be successfully implemented by measuring the coinci-  
58 dence of acoustic feature responses to perform speech segregation (*Krishnan et al., 2014*). It has  
59 also validated single-unit studies in ferret auditory cortex, which tested the importance of atten-  
60 tion and temporal coherence in stream formation and selection, and further demonstrated that  
61 the responses and connectivity among responsive neurons were rapidly enhanced by synchronous  
62 stimuli and suppressed by asynchronous sounds, but only when the ferrets actively attended to  
63 the stimuli (*Lu et al., 2017*). Exactly the same idea has been shown to be relevant in the binding of  
64 multisensory auditory-visual streams both in cortical responses and in psychoacoustic tests (*Bizley*  
65 *et al., 2016; Atilgan et al., 2018; Atilgan and Bizley, 2021*), as well as to explain stream formation  
66 associated with comodulation masking release (*Krogholt Christiansen and Oxenham, 2014*)

67 In this study, we sought to investigate the properties and dynamics of the temporal coherence  
68 principle using the more accessible EEG recordings in human subjects while performing psychoa-  
69 coustic tasks with a wide variety of stimuli, including natural speech. The experiments tested sev-  
70 eral key predictions of the temporal coherence hypothesis (schematized in *Figure 1*), primarily the  
71 coincidence of the neural responses to any acoustic features is the fundamental and overriding de-  
72 terminant of the segregated perception of an auditory stream. Thus, it is *not* the specific nature of  
73 the features (e.g., being a single-tone, tone-complex, or a noise burst) or the harmonic relationship

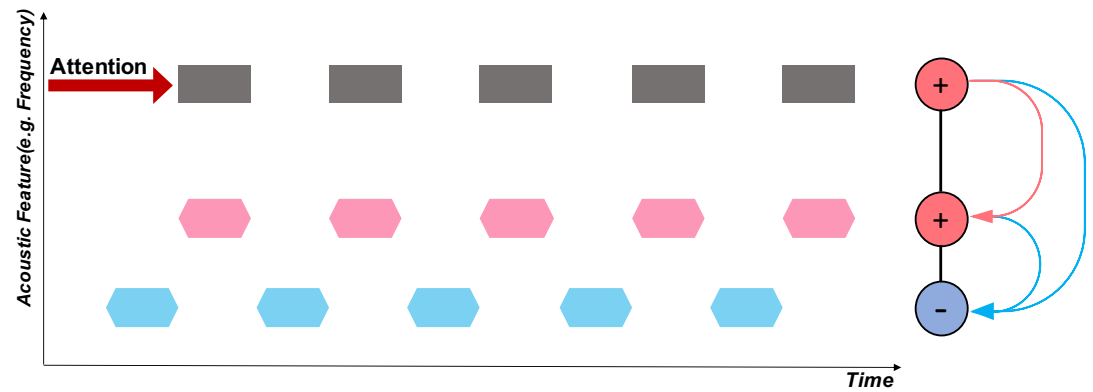

**Figure 1.** Schematic of attention and the temporal coherence principle. The horizontal axis is time, and the vertical axis depicts an arbitrary feature dimension of interest (e.g., spectral frequency, fundamental frequency (pitch), or location). Three separate sequences of sound tokens are depicted: two are synchronized (in black/pink), alternating (or de-synchronized) with another sequence (in blue). If attention is focused on the black sequence, its neural responses become enhanced. Because of its temporal coherence with the pink sequence, mutual excitation causes the two to bind, thus becoming enhanced together. By contrast, the blue stream is asynchronous (temporally incoherent), and hence it is suppressed by rapidly formed mutually inhibitory interactions (depicted in blue).

74 among the tones of the complex that determines their binding. Rather, it is the temporal coinci-  
75 dence among the components that matter. A second prediction of the hypothesis is that directing  
76 attention to a specific feature (e.g., a tone in a complex) not only enhances (or modulates) the re-  
77 sponse of the neurons tuned to it but would also bind it or similarly modulate the responses of all  
78 other neurons that are synchronized with it. Conversely, attending to a target sound is postulated  
79 to suppresses responses due to acoustic features that are highly uncorrelated with the target. An-  
80 other aspect of the temporal coherence hypothesis that has already been explored is the rapid  
81 dynamic nature of the binding among the components of a stream (Lu *et al.*, 2017), which explains  
82 how listeners are able to switch attention and rapidly reorganize their auditory scene according  
83 to their desired focus. Nevertheless, the role of attention in stream formation can be somewhat  
84 ambiguous in that many studies have demonstrated streaming indicators even in the absence of  
85 selective attention (O'Sullivan *et al.*, 2015; Sussman, 2017). However, even in these cases, deploy-  
86 ing selective attention always enhanced the responses, significantly confirming its important role  
87 in mediating the streaming percept.

88 However, it should be noted that conducting these experiments and analyses with EEG record-  
89 ings is difficult because of the extensive spatial spread of the responses across the scalp. This  
90 introduces two types of challenges that must be overcome. First, it is hard to resolve and assess  
91 the binding of individual frequency components in a complex or in a speech mixture that contains  
92 many other nearby components. Second, because the responses from many neural sources inter-  
93 act and superimpose in EEG recordings, a response enhancement due, for example, to attention  
94 to a specific feature may be accompanied by suppression of responses from a competing feature.  
95 Hence, the total response becomes instead manifested as a complex, unintuitive modulation of  
96 the response patterns. Both of these challenges can be overcome by the techniques presented in

97 this report. Specifically, we addressed the spectral resolution problem by presenting isolated tone  
98 probes *immediately after* the end of the complex stimuli. By aligning a probe tone with various  
99 spectral components of the preceding stimulus and measuring the *persistent* effects of attention  
100 on its responses just after the stimulus, we could detect the attentional effects on the responses  
101 to individual components within these complex stimuli. Furthermore, to decode and assess these  
102 changes directly from the complicated distributed EEG responses, we resorted to a pattern clas-  
103 sification technique that quantified whether attention significantly altered (or modulated) the re-  
104 sponse patterns and for how long before and after.

## 105 Results

106 The results described here are of EEG experiments conducted on normal-hearing subjects. De-  
107 tails of the experimental setup, subjects, and stimuli are provided in each subsection below, as  
108 well as in the Methods *section*. The experiments begin by exploring the consequences of tempo-  
109 ral coherence on simple harmonic tone-complexes at a uniform rate and progress to inharmonic  
110 complexes, irregular presentation rates, mixed tone and noise sequences, and ending with speech  
111 mixtures.

112 Note that all of the stimulus paradigms in this study were selected to closely resemble “classical”  
113 paradigms of streaming, e.g., alternating and synchronous tones and complexes. Thus, properties  
114 of the streaming precepts associated with these stimuli are already well-established and have been  
115 studied extensively, as we shall point out. Furthermore, the objective segregation measures we  
116 employ closely follow widely-used “deviant-detection” paradigms (*Moore and Gockel, 2002; Elhilali*  
117 *et al., 2009; Micheyl and Oxenham, 2010; Carlyon et al., 2010*).

### 118 Experiment 1: Binding the harmonic components of complex streams

119 In this experiment, we manipulated the streaming percepts evoked by alternating harmonic com-  
120 plexes of different pitches (*Singh, 1987; Bregman et al., 1990; Grimault et al., 2001*). We specifi-  
121 cally investigated how attention to one of the two streams modulates the neural response to the  
122 complexes’ individual constituent tones. For example, consider the two alternating sequences of  
123 harmonic complex tones in *Figure 2A*. The complexes in the two streams had fundamental frequen-  
124 cies of  $F_A = 400$  Hz and  $F_B = 600$  Hz, 90 ms in duration, and were separated by 20-ms gaps, with  
125 10-ms raised-cosine onset and offset ramp. When attending to one stream, the EEG responses  
126 are known to become enhanced to the attended complexes (*Xiang et al., 2010; Power et al., 2012;*  
127 *Choi et al., 2013*). However, it is unclear whether this enhancement is due to enhanced responses  
128 to the individual tones within the attended complex or just an enhancement of the channels selec-  
129 tively responding to the complexes’ pitch. Conceptually, we shall hypothesize that the attentional  
130 focus on one stream effectively confers a *steady* enhancement of the responses in the frequency  
131 channels of the constituent tones, specifically those tones that are unique to the attended stream.  
132 In the next experiment, we explore the fate of tones that are shared between the two streams.

133 Because of the poor spatial resolution of the EEG recordings, it was difficult to investigate the  
134 attentional effects on individual frequency components during the simultaneous streams. Instead,  
135 we probed the *persistent* modulatory effects of attention on individual frequency channels immedi-

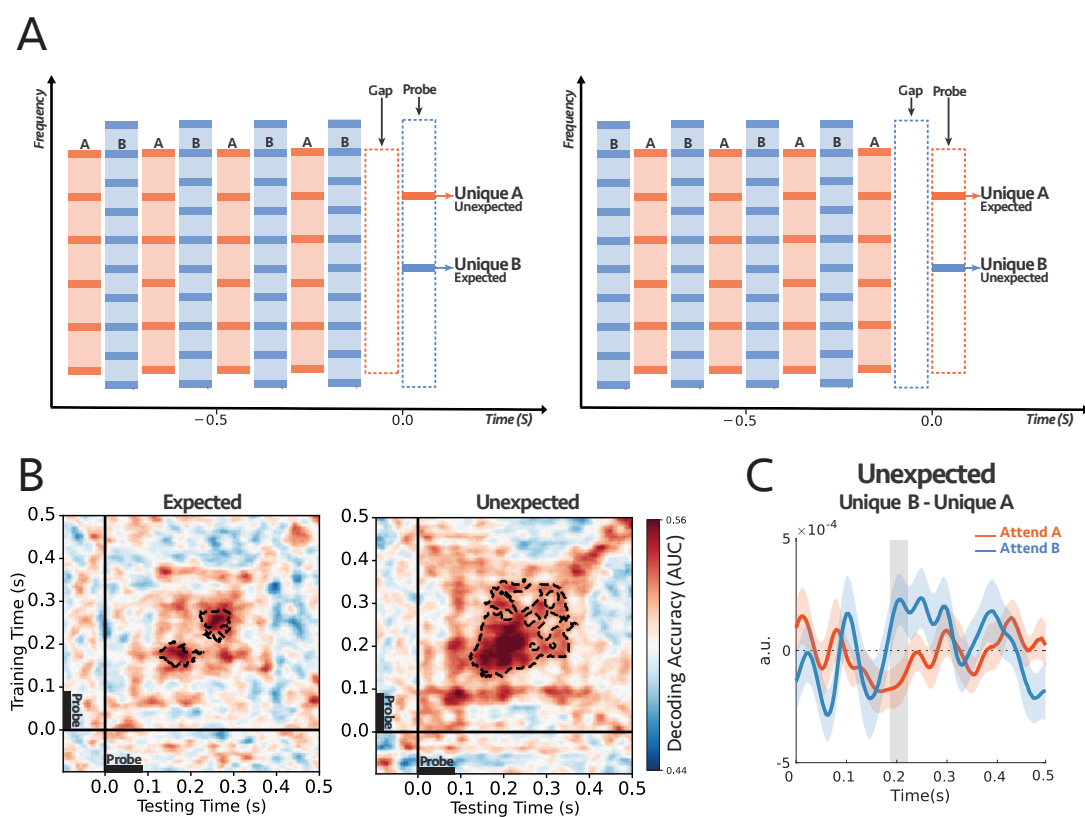

**Figure 2. Experiment 1: (A)** The stimulus consisted of two complex sequences with harmonically-related tones. In each trial, subjects were instructed to selectively attend to high or low pitch sequence and counted intensity deviants in the target stream. One of the frequency channels unique to tone complex A (unique A) or complex B (unique B) was probed at the end of each trial. **(B)** Decoding performance for Expected (left) and Unexpected (right) probe-tones (see the text for further explanation on the difference between the two paradigms). For each subject, classifiers were trained on the signals from all 64 EEG sensors and tested separately at each time in a 600 ms time window encompassing the probe tone (-100ms to 500ms). The trained classifiers tried to decode the target of attention within the mentioned time window. The cluster-corrected significance was contoured with a dashed line,  $p = 0.038$  for expected and  $p = 0.004$  for unexpected. Thus, both probes demonstrated significant attentional modulations of individual harmonic components, although the classification patterns were different between the two conditions. **(C)** Comparing the difference in responses to unique A and unique B probe-tones for two attentional conditions for the first DSS component (**Figure 2-Figure Supplement 3**; see text and Methods *section* for details). The comparison was significant for unexpected probes at around 200 ms after the probe onset (shaded area larger than  $2\sigma$ ), with reverse polarity for *attend A* and *attend B*, suggesting the opposite effect of attention on coherent and incoherent tones (i.e., enhancement *versus* suppression). ( $n=18$ ).

**Figure 2-Figure supplement 1.** Behavioral results

**Figure 2-Figure supplement 2.** The relation between the classifier scores and EEG topomaps (a subject example).

**Figure 2-Figure supplement 3.** DSS evoked response

136 ately following the end of the streams. This was done by presenting a 90 ms pure probe-tone after  
 137 a 100 ms silent gap. The probe tone was aligned with the frequency of a harmonic that is either  
 138 unique to complex A (3000 Hz) or tone complex B (2000 Hz). There were two conditions for the  
 139 timing of the probe-tone (**Figure 2A**): "expected", in which the probe was a component of the *last*

140 complex tone in the sequence (note that there is a gap between the last complex in the sequence  
141 and the probe-tone) or "unexpected" where it was a component of the *penultimate* complex tone  
142 in the sequence. The reason for these two conditions was to ascertain that the modulation of  
143 the probe-tone responses was not related to its violation of expectations (akin to the effects of  
144 "mismatched negativity") but rather to the persistent effects of attending to one stream versus  
145 another.

146 18 normal-hearing participants were instructed on each trial to selectively attend to tone com-  
147 plex A or B and report the number of intensity deviants in the attended stream – with the deviant  
148 tone-complex is 6 dB louder than other tones in the sequence. Subjects reported hearing the two  
149 streams and being able to attend reliably to one as the behavioral results indicate, with all subjects  
150 reported the correct number of deviants above the chance level (**Figure 2–Figure Supplement 1**).  
151 To dissect the attentional effects on the responses to the two streams, we trained a set of indepen-  
152 dent logistic regression classifiers using data from all EEG sensors as explained in detail in Methods  
153 **section** (**King and Dehaene, 2014; Stokes et al., 2015; Wolff et al., 2017**). These classifiers trained on  
154 the EEG responses to the probe-tones at each time point  $t$  and tested at time  $t'$  – where  $t$  and  $t'$  were  
155 within the probe-tone time window (-100 ms to 500 ms) – in order to predict the target of attention.  
156 In other words, the trained classifiers tried to linearly separate the attentional conditions based on  
157 the differences within the probe topomaps. At the subject level, the classifier scores reflected the  
158 robustness of the effect across the trials (see the example in **Figure 2–Figure Supplement 2**), and  
159 at the second level, we checked the consistency of the effect size across all subjects (**Figure 2B**). It  
160 should be noted again here that, because of the complex spatial spread of the EEG, the decoders  
161 can detect if response patterns across the scalp are modulated by the attentional focus on the  
162 unique components, but they cannot readily indicate whether the effects are simple response en-  
163 hancements. For this kind of additional information, we resorted to a Denoising Source Separation  
164 (DSS) procedure to extract and examine the principle response component as detailed later below.

165 The performance of the decoders is depicted in **Figure 2B**. The scores of the classifiers are signif-  
166 icantly above the chance level for both *Expected* ( $p = 0.038$ ) and *Unexpected* ( $p = 0.004$ ), starting from  
167 about 150 ms to 350 ms after the probe-tone onset. This performance level (up to 0.60) is commen-  
168 surate with that reported in previous studies (**King et al., 2016; Pinheiro-Chagas et al., 2018**). Thus,  
169 regardless of probe-tone timing and its different response dynamics due to its (expected or unex-  
170 pected) context, the results demonstrate the persistent, significant differential modulatory effects  
171 of attention on the *unique* individual harmonic components of the attended and unattended se-  
172 quences. We should note that the decoder significant regions differ between the two conditions of  
173 "expected" and "unexpected" probes, likely because of the differences in the detailed response pat-  
174 terns to the probes, as well as the effects of EEG noise which may render insignificant the response  
175 modulations at different epochs following the onset. Nevertheless, in both cases of the expected  
176 and unexpected probes, there were significant attentional modulations of the responses.

177 Finally, we attempted to extract an additional comparison among the probe responses under  
178 the different attentional conditions using a denoising procedure on the EEG recordings. Specifically,  
179 we isolated the most repeatable auditory component from the EEG responses to the probe-tones  
180 across trials using the DSS spatial filter (see Methods **section** ; **De Cheveigné and Parra (2014)**) and

181 compared the average waveform of the first DSS component and its amplitude over subjects under  
182 different conditions (see **Figure 2–Figure Supplement 3** for the waveforms). Importantly, we com-  
183 pared the *difference* in responses to the probes:  $UniqueB - UniqueA$ , under the attend A and attend  
184 B conditions. We hypothesized that, although the DSS waveform is a complex mixture of the EEG  
185 responses on all electrodes, if attention enhances coherent and suppresses incoherent responses,  
186 then the difference between the probes' DSS responses would be modulated by attention in op-  
187 posite directions, i.e., the difference:  $UniqueB - UniqueA$  would have the opposite signs for attend  
188 A and attend B, reflecting the enhancement and suppression due to attention. This was indeed  
189 the case as seen in **Figure 2C** for the unexpected case, where the difference in probes' responses  
190 was significantly modulated with a *reversed* polarity, at around 200 ms following the probe's onset  
191 (shaded interval). It should be noted that the extracted responses used for the DSS differences  
192 (**Figure 2C**) and the classifiers (**Figure 2B**) are quite different, and hence it is not surprising that the  
193 detailed timing of the significance epochs following the probe-tone onsets would differ.

194 In the next experiment, we explore these modulations in components shared by both A and B  
195 complexes, and whether harmonicity is necessary to induce these differential attentional effects  
196 and hence play a role in segregation.

## 197 **Experiment 2: Binding of inharmonic components in complex streams**

198 Here we extended the results of the previous experiment in several directions. *First*, we examined  
199 whether the modulatory effects of attention on the individual components of a tone complex de-  
200 pended on the harmonicity of the complex. *Second*, we monitored whether components *shared*  
201 between the two complex sequences experience any differential modulation. This is an important  
202 question because we had hypothesized that attention is a slow or steady-state enhancement of  
203 the components of one sequence. A shared frequency channel (by definition) belongs to both the  
204 attended and unattended streams, and hence if it is subjected to attentional effects, it must ex-  
205 perience rapidly alternating enhancement and suppression, which would violate our hypothesis.  
206 Instead, our hypothesis predicts that shared components would not be differentially affected by  
207 selective attention to either stream. *Third*, temporal coherence is independent of the exact tempo-  
208 ral rates or regularity of the sequences (as long as they are roughly between 2-20 Hz (**Shamma and**  
209 **Elhilali, 2020**)). Consequently, we expected temporal coherence to be equally effective for streams  
210 of different rates (tone complexes that are temporally incoherent with each other), regardless of  
211 whether the tone complex is harmonic or inharmonic. It is, of course, expected that the streaming  
212 percept is modulated by all these parameters, i.e., whether the components of a sound are intrin-  
213 sically more glued together by harmonicity regardless of streaming. By using unequal sequence  
214 rates, it was possible (as we shall elaborate) to eliminate any difference in timing expectations be-  
215 tween the attention conditions and hence confirm the validity of the earlier results concerning the  
216 probe tones expectations.

217 Normal-hearing adults (21) selectively attended to one of two streams – each 90 ms in duration,  
218 with 150 ms and 250 ms inter-stimulus interval for complex A and B – based on the priming phase  
219 at the beginning of each trial, and reported whether they detected a deviant in the attended stream,  
220 ignoring deviants in the unattended stream. The two streams clearly differed by their timbre, and it

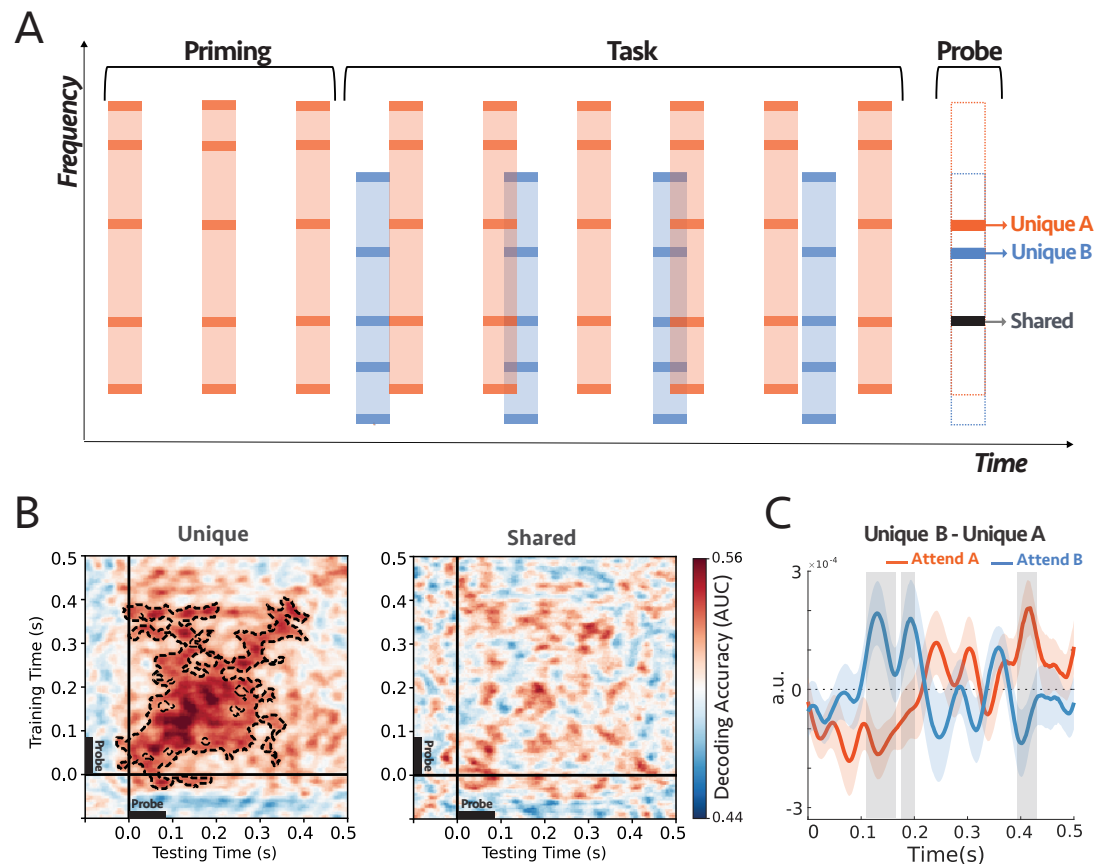

**Figure 3. Experiment 2: (A)** The stimuli started with a target sequence alone (Priming epoch), and after three bursts, the distractor stream was added. Both tone complexes consisted of inharmonic frequencies (see Methods section). The two sequences were presented at different rates but converging on the last tone in the sequence, which was replaced by a single frequency probe-tone centered at the frequency that was either shared between the two complexes, unique to complex A (Orange), or unique to complex B (Blue). In each trial, subjects were instructed to selectively attend and detect an intensity deviant in the target sequence. **(B)** Decoding performance for unique (left) and shared (right) probe-tones. Classifiers trained and tested separately at each time in a 600 ms time window of the probe-tone (-100ms to 500ms). Cluster-corrected significance is contoured with a dashed line. The classifiers could decode attention only when the probes were unique components ( $p = 0.0003$ ). The two sets of scores were statistically different as depicted in Figure 3-Figure Supplement 2. **(C)** Comparing the difference in the first DSS component of the responses to unique A and unique B probe-tones in the two attentional conditions (Figure 3-Figure Supplement 4; see Methods section). The comparison was highly significant for shaded areas (larger than  $2\sigma$ ), with reverse polarity for attend A and attend B, suggesting the opposite effects of attention on coherent and incoherent tones (i.e., enhancement versus suppression). ( $n=21$ ).

**Figure 3-Figure supplement 1.** Behavioral results

**Figure 3-Figure supplement 2.** Comparison between unique and shared decoder scores

**Figure 3-Figure supplement 3.** The relation between the classifier scores and EEG topomaps (one subject example).

**Figure 3-Figure supplement 4.** DSS evoked response.

221 was relatively easy for the listeners to track one or the other stream (see behavioral results **Figure 3-**  
 222 **Figure Supplement 1**). The streams ran at different rates but converged to be synchronous on the



223 last tone in the sequence. We replaced the last tone with a single frequency probe-tone to always  
224 occur at the expected time, regardless of which stream was the target of attention (**Figure 3A**). We  
225 measured the neural responses to the probe as a function of whether its frequency belonged to  
226 one (unique) or both complexes (shared) (see **Figure 3A**). We should note that this paradigm was  
227 effectively used previously to explore the effects of streaming on detecting timing misalignments  
228 between streams (**Elhilali et al., 2009**).

229 Similar to the previous experiment's analysis, a set of linear estimators were trained to deter-  
230 mine the effect of attention encompassing the period of probe-tone (-100 ms to 500 ms; **Figure 3B**).  
231 The classifiers were trained on the EEG signals to predict the attentional conditions for probe-tones,  
232 therefore for each subject, the scores summarized the effect of attention within the probe-tones  
233 (see **Figure 3–Figure Supplement 3**). For the unique probe-tones, the performance of the classifiers  
234 in decoding attention was reliably above the chance level at 50 ms and lasted until about 400 ms af-  
235 ter the onset of the probe, with a peak around 120 ms ( $p = 0.0003$ ), indicating the persistent effects  
236 of attention on the unique components. However, the classifiers could not distinguish between  
237 the attention conditions when the probe-tone was shared between the two tone-complexes, sug-  
238 gesting that the shared frequency channels remained on average undifferentiated by the selective  
239 attention.

240 It is important to note that all comparisons above are between responses to the *identical probes*  
241 under different attentional conditions. Hence, we have avoided comparing the effects between the  
242 responses to the unique *versus* shared probe. However, the results of such a direct comparison  
243 are shown in **Figure 3–Figure Supplement 2**, and they confirm the significant modulatory effects  
244 of attention on the unique probe responses relative to the shared probes.

245 We further analyzed the EEG responses to isolate the most repeatable neural sources with a  
246 DSS spatial filter (**Figure 3–Figure Supplement 4A**). As in the previous experiment, we compared  
247 "*Unique B – Unique A*" in attend A *versus* attend B conditions. We found the difference in responses  
248 evoked by unique A and unique B has the opposite polarity for two attentional conditions, and  
249 there are significant differences between them (**Figure 3C**). Furthermore, the average strength of  
250 the EEG response to the unique probes from 60 ms to 200 ms was significantly larger when the  
251 probe was a unique component of the attended sequence ( $p = 0.03$  for Unique A and  $p = 0.01$  for  
252 Unique B), but no significant difference was observed in response to shared channels when the  
253 subject attended to tone complex A or tone complex B ( $p = 0.6$ ; **Figure 3–Figure Supplement 4B**).  
254 These results, therefore, confirm that attention relatively modulates the unique frequency compo-  
255 nents of the attended complex. We emphasize that this attentional modulation occurred despite  
256 the *inharmonic*ity of the components, and hence we conclude that these effects are due to the  
257 temporal coherence of the tone components and not any harmonic relation among them. In ad-  
258 dition, consistent with the temporal coherence predictions made above, the shared component  
259 remained undifferentiated by the attentional focus.

### 260 **Experiment 3: Binding Noise Sequences with coherent tones sequences**

261 Experiments 1 and 2 confirmed that the binding of the components within a stream relies primarily  
262 on their temporal coherence and not on any harmonic relationship among them and that differ-

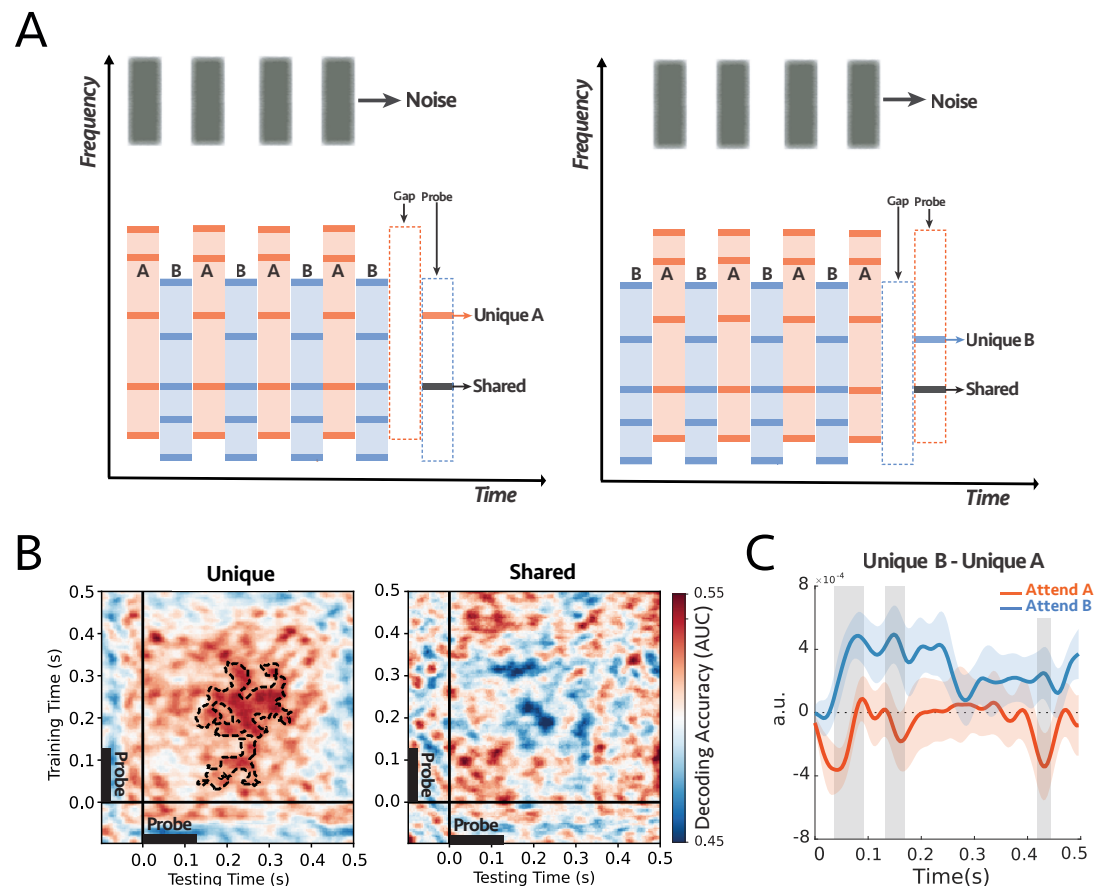

**Figure 4. Experiment 3:** (A) The stimulus consisted of two complex sequences with inharmonic frequencies - the frequency components of the complex tones were the same as experiment 2 - and a sequence of noise as a target stream. In each trial, subjects were instructed to always attend and count intensity deviants in the target noise sequence. At the end of each trial, we probed a unique frequency channel to tone complex A or complex B or shared between the two complex tones. (B) Decoding performance for unique (left) and shared (right) probe-tones. Classifiers trained and tested separately at each time in a 600 ms time window of the probe-tone (-100ms to 500ms). The significant cluster is contoured with a dashed line. The classifiers could decode attention only when the probes are unique components ( $p = 0.004$ ). There is a statistical difference between the unique and shared scores as depicted in *Figure 4-Figure Supplement 2*. (C) Comparison between the difference in responses to unique A and unique B probe-tones for two attentional conditions for the first DSS component (*Figure 4-Figure Supplement 3*; see Methods section). There were significant differences for shaded areas (larger than  $2\sigma$ ), with reverse polarity for *attend A* and *attend B*, suggesting the opposite effect of attention on coherent and incoherent tones (i.e., enhancement and suppression). ( $n=14$ ).

**Figure 4-Figure supplement 1.** Behavioral results

**Figure 4-Figure supplement 2.** Comparison between unique and shared decoder scores

**Figure 4-Figure supplement 3.** DSS evoked response.

263 ent sequences segregate well when running at different rates. Here, we investigate binding one  
 264 step further to demonstrate that temporally coherent sound elements bind perceptually to form  
 265 a stream even when they are of a different nature, e.g., tones and noise-bursts, and even when  
 266 placed far-apart along the tonotopic axis. Specifically, Experiment 3 tested the hypothesis that  
 267 attending to a distinct stream of noise bursts not only will modulate its neural responses it also

268 affects all others that are temporally coherent with it, effectively binding the percept of the noise  
269 with the coherent tones to form a single unified stream. Moreover, we tested again if shared tones  
270 remain uncommitted as we found earlier, hence contributing equally to both streams.

271 **Figure 4A** illustrates the stimuli and procedures used with 14 normal-hearing subjects who were  
272 instructed to focus attention on a sequence of narrow-band noise bursts – between 2-3 kHz, 125  
273 ms tone duration, and 250 ms inter-stimulus interval – and report the number of deviants that  
274 occurred in the noise stream. Two sequences of inharmonic tone complexes (A and B) accompa-  
275 nished the noise sequence, one coherent with the noise (the attended stream) and one alternating  
276 (incoherent) with it. At the end of each trial, a single frequency probe-tone was presented at fre-  
277 quencies aligned with either a unique component of complexes A or B or a component shared by  
278 both complexes. All subjects perceived the streaming of the alternating stimuli and performed the  
279 task above the chance level as demonstrated by the behavioral results in **Figure 4–Figure Supple-**  
280 **ment 1**.

281 As before, we trained classifiers to detect modulations on the probe tone responses during,  
282 pre, and post the probe tone onsets (at 0 ms). Results displayed in (**Figure 4B**) demonstrate that at-  
283 tention significantly modulates the probe-tone responses starting 130 ms following onset but only  
284 when aligned with unique tones of the complex-tone sequences ( $p = 0.004$ ; **Figure 4B**, left panel).  
285 The classifier failed to decode any modulations due to attention when the probe-tone aligned with  
286 a shared component (**Figure 4B**, right panel). Moreover, there was a statistical difference between  
287 the decoder scores of Unique and Shared probe tones, as illustrated in **Figure 4–Figure Supple-**  
288 **ment 2**.

289 We then analyzed the EEG responses to extract the most repeatable auditory component across  
290 trials by looking at the first DSS component (see Methods *section* ), which was averaged across all  
291 subjects (**Figure 4–Figure Supplement 3A**). **Figure 4C** illustrates the difference between the unique  
292 probes  $UniqueB - UniqueA$  under attend A (orange) and attend B (blue) conditions. For most of  
293 the time period encompassing the probe tone, the difference exhibited the opposite polarity in  
294 the two attention conditions, with high significance near 70 ms, 160 ms, and 420 ms following  
295 the probe's onset. Furthermore, we looked at the *average* of the first DSS components over the  
296 time window of 60 ms to 200 ms. The average power is significantly larger when the probe-tone  
297 is a unique component of the attended stream ( $p = 0.04$  for unique A and  $p = 0.01$  for unique B).  
298 However, there is no significant difference in response to the shared frequency channel ( $p = 0.24$ ;  
299 **Figure 4–Figure Supplement 3B**).

300 To summarize, the key finding of this experiment is that attending to the noise-bursts, which  
301 are perceptually different from the tones and spectrally located at least 2.5 octaves apart, never-  
302 theless caused the coherent complex-tone sequences to become modulated as if they became  
303 bound to the noise-bursts and included in the focus of attention. This is consistent with the earlier  
304 experiments' findings in the present study that coherent tones are modulated when subjects at-  
305 tended directly to the complexes. This we take as evidence of the perceptual binding of all coherent  
306 acoustic components to form a unified attended stream.

## 307 **Experiment 4: Segregating Speech Mixtures**

308 Real-world auditory scenes often consist of sound streams of unequal rates, many shared spectral  
309 components, and gradually changing parameters (pitch, location, or timbre). In all previous exper-  
310 iments, we have demonstrated that temporal coherence plays a crucial role in stream formation.  
311 However, all stimuli used were well-controlled, relatively simple tone-complexes and noise bursts  
312 with stationary parameters. Here, we extend the temporal coherence principle tests to a more nat-  
313 uralistic context using speech mixtures. In a speech, the signal is modulated in power during the  
314 succession of syllables, just like the tone and noise sequences used in the previous experiments,  
315 i.e., one can abstractly view a speech signal as a sequence of bursts separated by gaps of various  
316 durations. Each burst encodes features of the speaker's voice, such as his/her pitch, location, and  
317 timbre, which temporally fluctuate in power coherently. In a mixture of two different speakers,  
318 female (F) and male (M), saying different words, the sequences of bursts begin to resemble the  
319 alternating A & B complexes of our simpler stimuli. Consequently, the power in each speaker's  
320 features would fluctuate coherently, but they are both different and out-of-sync with those of the  
321 other speaker. Furthermore, simultaneous speech segregation can potentially rely on the incoher-  
322 ence between the power modulations of the two speech streams since speakers utter different  
323 words, and hence their modulations are often de-synchronized (*Krishnan et al., 2014*).

324 To confirm these assertions, we first tested that the same approaches using probe-tones and  
325 trained classifiers can be readily applied to decoding speech responses. The probe-tones were  
326 restricted to the end of the sentences and were always harmonic complexes, as detailed below. In  
327 the second part of experiment 4, we refined the probe-tones to investigate the attentional modu-  
328 lations on single frequency components, and more importantly, to insert the probe anywhere in  
329 the midst of the speech mixture.

### 330 **a) Probe at the end:**

331 Single-speaker sentences were selected from the CRM corpus (*Bolia et al., 2000*) and then mixed  
332 to produce two-speaker mixtures, each containing a male and a female voice. All sentences in  
333 this corpus have the same format, including color and a number (see Methods *section*). During  
334 the task, subjects were instructed to attend to a specific speaker on each trial and then report the  
335 color and number uttered by this target speaker. The mixture in each trial ended with a 90 ms  
336 harmonic-complex tone as a probe, consisting of the 4 lowest harmonics aligned with correspond-  
337 ing frequency components of either the attended or unattended voice. Therefore, the probe-tone  
338 was uniquely aligned with one speaker, as were the single-tone probes in the earlier experiments  
339 (*Figure 5A*).

340 16 Participants were asked to report the color and the number mentioned in the target sen-  
341 tence to make sure that they were attending correctly to the target speaker, all the subjects were  
342 able to do the task with ease (average accuracy = 93%; *Figure 5-Figure Supplement 1*). Meanwhile,  
343 we measured the neural responses to the probe-tone with EEG. The responses were compared un-  
344 der different attention conditions using the same linear classifiers described earlier, with decoder  
345 scores significantly above the chance level (*Figure 5B*). Additionally, we generalized the modulatory  
346 pattern of attention by using classifiers trained and tested at various times relative to the probe

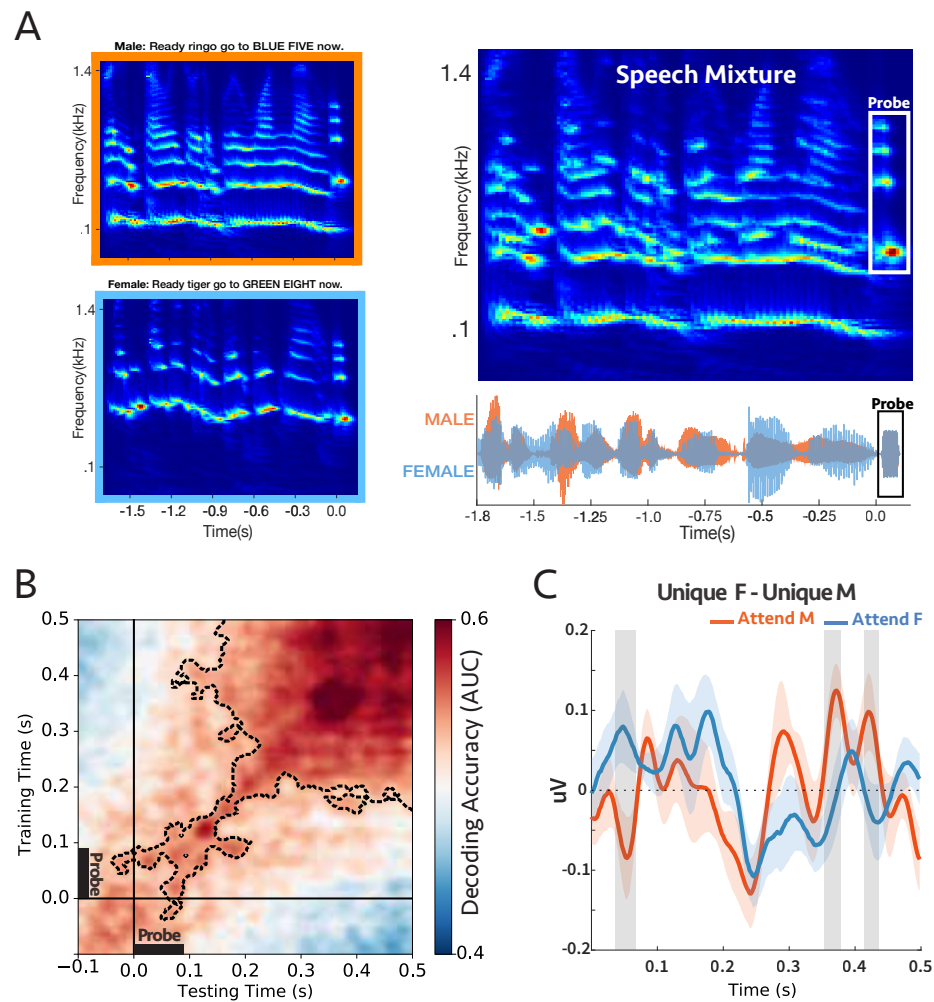

**Figure 5. Experiment 4a: (A)** A sample stimulus for experiment 4a. *Top-left*: cochlear spectrogram of the male voice. *Bottom-left*: cochlear spectrogram of the female voice. Note the probe-tone at the end. *Right*: cochlear spectrogram and acoustic waveform of the mixture. All the sentences had the same length (1.8 sec). The participants were instructed to report the color or the number by the target voice. During the task, the auditory scene consisted of two concurrent speech streams followed by a 90 ms probe-tone with complex harmonics. The probe-tones harmonic frequencies were aligned with the four loudest harmonic frequencies of either male or female voice at the end of the sentences; therefore, the probe-tone was either unique to male or unique to female. **(B)** Decoding performance for the probe-tones trained and tested during the probe time window (-100ms to 500ms). The significant clusters were contoured with a dashed line. The classifiers could decode attention significantly above chance ( $p = 0.0002$ ) **(C)** Comparison between the difference in evoked responses to unique F and unique M probe-tones for two attentional conditions at Cz channel (placed on the center of the mid-line sagittal plane) (*Figure 5-Figure Supplement 3*; see *Methods section*). There were significant differences for shaded areas (larger than  $2\sigma$ ), suggesting the opposite effect of attention on coherent and incoherent tones. ( $n=16$ ).

**Figure 5-Figure supplement 1.** Behavioral Results.

**Figure 5-Figure supplement 2.** Generalizing decoders across time

**Figure 5-Figure supplement 3.** Evoked responses at channel Cz

347 onset, e.g., trained at the beginning of the speech mixture (-1.8 to -1.2 s) and tested around the  
 348 probes (-0.1 to 0.5s; *Figure 5-Figure Supplement 2* left panel), trained near the probe (-0.1 to 0.5

349 s) and tested at the onset of the speech mixture (-1.8 to -1.2 s; **Figure 5–Figure Supplement 2** right  
350 panel) In all cases above, the decoding scores were significantly above chance as is evident in the  
351 figures ( $p = 0.0002$ ,  $p = 0.009$ , and  $p = 0.009$  respectively). We also contrasted the evoked responses  
352 to the probe-tones ( $UniqueF - UniqueM$ ) at the Cz channel and observed significant differences  
353 between attending to male and female, with opposite polarity (**Figure 5C**).

354 Therefore, the results thus far indicate that: 1) The neural response to the harmonic frequency  
355 components aligned to the pitch of the two speakers is reliably modulated by attention. 2) The  
356 pattern of brain activity at the onset of the attended/unattended speech sentence is similar to the  
357 activity during the probe tone at the end, and consequently, the trained decoders were general-  
358 izable for these two time windows even when separated by a sizable interval. These results are  
359 consistent with the temporal coherence hypothesis because if attention to the pitch of one voice  
360 enhances the pitch signal, it will enhance its harmonics (all being coherent with it; **Krishnan et al.**  
361 **(2014)**) and will relatively suppress the harmonics of the unattended speaker, which are incoherent  
362 with it.

### 363 **b) Probe in the middle:**

364 Using the same speech corpus as stimuli, this experiment probed the modulations of a single fre-  
365 quency channel potentially anywhere within the duration of the speech mixture. The probe fre-  
366 quencies in these experiments were chosen centered at the 2nd harmonic of the female or at the  
367 3rd harmonic of the male, unique components in the midst of the speech mixtures as illustrated  
368 in **Figure 6A**. Participants were instructed to report the color or number spoken by the talker who  
369 uttered the target call-sign (“Ringo”; see Methods **section**), all participants did the task successfully  
370 (average accuracy = %79; **Figure 6–Figure Supplement 1**). On average, the onset of the call-sign oc-  
371 curred 300 ms ( $\pm 25$  ms) following sentence onset, and the probe-tone was inserted 600 ms after  
372 speech onset.

373 We trained linear classifiers to ascertain the modulation that attention induced in the probe  
374 responses during the time window (-200 ms to +400 ms with probe onset defined as 0). It is evident  
375 in **Figure 6B**) that the decoding scores were significantly above the chance level and lasted for up  
376 to 280 ms with a peak at 150 ms after the probe-tone onset. We also extracted the evoked EEG  
377 signal at channel Cz due to the probe-tones to determine the direction of the modulation induced  
378 by attention **Figure 6–Figure Supplement 2**. **Figure 6C** shows the difference in response to unique F  
379 and unique M was significantly and rapidly modulated by attention within about 250 ms, consistent  
380 with previous findings in ECoG recordings (**Mesgarani and Chang, 2012**).

381 Therefore, in conclusion, we measured significant attentional modulations of the probe-tone re-  
382 sponses that are frequency-specific (distinguishing between alignments with closely-spaced male  
383 and female harmonics). These findings indicate that during speech segregation, the components  
384 of the attended speaker are differentiated from those of the unattended source quite rapidly, or  
385 specifically, as soon as 250 ms after the onset of the target call-sign. This delay is commensurate  
386 with that observed in analogous ECoG experiments involving switching attention between 2 speak-  
387 ers.

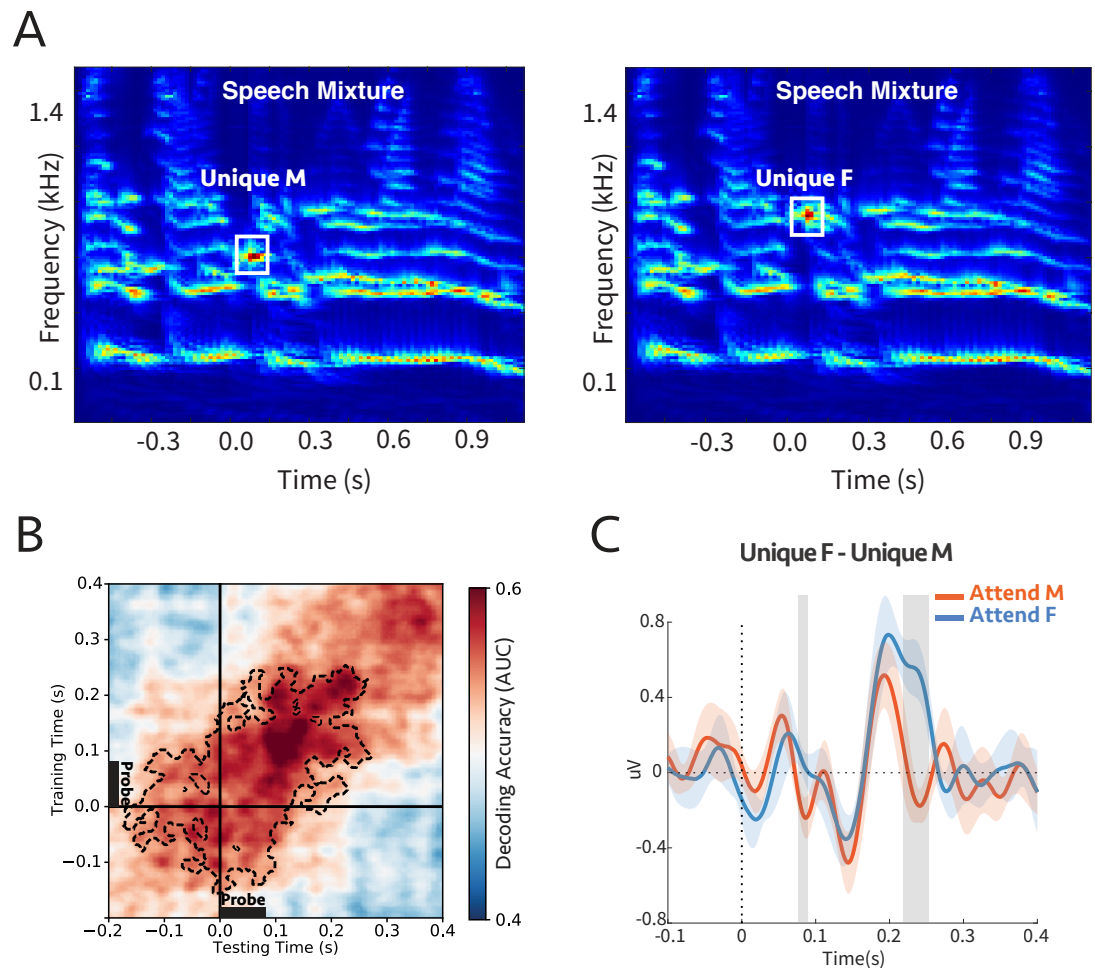

**Figure 6. Experiment 4b:** (A) Cochlear spectrogram of a sample stimulus mixture for experiment 4b. It consisted of two (male and female) voices. The participants were instructed to report the color or the number of the speaker who uttered the target call-sign. The probe's frequency was aligned with the 2nd or 3rd harmonic of the female or male, respectively. Therefore the probe-tone was either unique to male (unique M) or unique to female (unique F). (B) Decoding performance for the probe-tones. Classifiers trained and tested separately at each time in a 600 ms time window of the probe-tone (-200ms to 400ms). Cluster-corrected significance was contoured with a dashed line. The classifiers could decode attention significantly above chance for up to 280 ms after the probe-tone onset ( $p = 0.015$ ). (C) Comparison between the difference in evoked responses to unique F and unique M probe-tones for two attentional conditions at Cz channel (placed on the center of the mid-line sagittal plane) (Figure 6-Figure Supplement 2; see Methods section). There are significant differences for shaded areas (larger than  $2\sigma$ ), suggesting the opposite effect of attention on coherent and incoherent tones. ( $n=7$ ).

Figure 6-Figure supplement 1. Behavioral results.

Figure 6-Figure supplement 2. Evoked responses

## 388 Discussion

389 This study explored the dynamics and role of temporal coherence and attention in the binding  
 390 of features that belong to one auditory source and its segregation from background sources in a  
 391 cluttered auditory scene. The temporal coherence hypothesis predicts that acoustic features that  
 392 induce coherently-modulated neural responses should bind together perceptually to form a single

393 stream. One piece of evidence for this perceptual stream formation is taken to be the physiological  
394 enhancement of all the coherent responses. It is also postulated that an essential component of  
395 this process is attention directed to one or more of the coherent set of acoustic features, which  
396 then initiate mutual interactions, and hence binding of all coherent features. Previous studies have  
397 shown that responses to an attended (pure-tone) stream are enhanced relative to the remaining  
398 background in a mixture (*Ding and Simon, 2012; Snyder et al., 2006*). However, it has remained  
399 unclear whether the neural responses to the individual constituents of a complex stream are also  
400 similarly modulated by attention to only one of its elements and how this is related to its perceptual  
401 formation.

402 In the series of EEG experiments reported here, we demonstrated that when listeners attended  
403 to one attribute of a complex sound sequence, other temporally coherent responses were similarly  
404 modulated; incoherent responses were relatively suppressed (or *oppositely* modulated) while leav-  
405 ing shared elements unchanged. This was found to be true over a wide range of attributes, be  
406 it the pitch of a sequence of harmonic complexes (Experiment 1), the timbre of inharmonic com-  
407 plexes (Experiment 2), noise burst sequence (Experiment 3), or the call-sign by a single speaker  
408 in a mixture (Experiment 4). Of crucial importance, this was the case even for those features in  
409 the sound sequence that were *not* directly accessible to the listener. For example, when subjects  
410 attended to the pitch of a harmonic complex or the timbre of an inharmonic complex, they rarely  
411 reported being able to (or spontaneously) listen to the individual constituent tones, yet these com-  
412 ponents became modulated as if they were directly attended to. In fact, in experiment 3, subjects  
413 completely ignored the accompanying complex tones while attending only to the noise bursts, yet  
414 response modulations still occurred for the unique coherent tones, i.e., they acted as part of the  
415 foreground noise stream.

416 To access the responses of the individual components of a stream (despite the poor spatial  
417 resolution of the EEG), we investigated the responses to probe tones and probe complexes that  
418 relied on the persistent effects of attention in the midst or just following the end of the streams  
419 when there were no interfering signals from other sounds. The effects of attention on the probe  
420 responses, however, were not always easy to interpret because the array of the 64 EEG electrodes  
421 pick up complex mixed signals deriving from many regions of the brain. Thus, specifying and in-  
422 terpreting an EEG response to use for the measurement requires combining (and not simply av-  
423 eraging) the recordings from all these electrodes. Therefore, the term "response enhancements"  
424 used in our original hypothesis does not always literally mean an *increased* response amplitude  
425 or power, but rather a response-modification that is robust and repeatable when attentional con-  
426 ditions are identically manipulated. While these changes are often detected as enhancements in  
427 the power of the response DSS component (particularly when using simple pure-tone streams (*Xi-*  
428 *ang et al., 2010; Power et al., 2012*) instead of the complex multi-component streams here), we  
429 focused instead on a more flexible measurement approach that detects these changes through  
430 linear estimators. Specifically, a set of classifiers were trained to decode the attended/unattended  
431 responses near the probe-tone time window, and were then tested at other times (such as general-  
432 izing the estimators to the speech beginning) to demonstrate that the response patterns induced  
433 by attention persisted during and subsequent to the probe.



434 To summarize, the overall findings from this study are consistent with the temporal coherence  
435 hypothesis where correlated responses become bound as a single stream that integrates the ele-  
436 ments of the sequences regardless of: (1) the temporal regularity of the sequences, e.g., uniform  
437 or irregular (*Figure 2* and *Figure 3*); (2) stimulus types across the sequences, e.g., noise or tones-  
438 complexes (*Figure 4*); (3) whether the tones are harmonic or inharmonic complexes (*Figure 2, Fig-  
439 ure 3, and Figure 4*); (4) whether the sequences are spectrally near or far apart (*Figure 2, Figure 3,  
440 Figure 4, and Figure 5*); and crucially, (5) whether the sequence parameters (e.g., pitch and timbre)  
441 are stationary or dynamically slowly evolving as in speech (*Figure 5 and Figure 6*).

442 Temporal coherence is essentially an associative process likely enabled by rapidly formed and  
443 modulated connectivity among coherently responsive neurons. This process is analogous to the  
444 well-known Hebb's rule of "*fire together, wire together*", except that it occurs at a much faster pace  
445 (within hundreds of milliseconds, as evidenced by the rapid build-up following the call-signs in  
446 *Figure 6*). It is also promoted and controlled by "attention", a notion that is difficult to define pre-  
447 cisely. However, experiments in animals and human subjects have demonstrated that without the  
448 engagement and attentional focus on the task, or selective attention to specific features of the  
449 stimuli, these rapid modulations of connectivity which are manifested as perceptual binding, and  
450 hence stream formation, become far weaker or absent (*O'Sullivan et al., 2015; Lu et al., 2017*). The  
451 underlying biological foundations of this process remain largely unknown but are currently the  
452 target of numerous ongoing studies.

453 We end by noting that the concept of temporal coherence likely applies in a similar way in other  
454 sensory modalities such as vision. In a dynamic visual scene, features of a visual object, such as its  
455 pixels, move together coherently in the same direction and speed, inducing highly correlated neu-  
456 ral responses. Conversely, pixels of independent objects move with different relative motion and  
457 can thus be segregated easily from those of other objects based on this idea (*Lee and Blake, 1999*).  
458 Also, multi-modal integration, such as enhanced comprehension of speech in an audio-visual sce-  
459 nario (lip-reading), may well be explained by temporal coherence, i.e., the temporal coincidence  
460 between the visual representation of the lip motion and the acoustic features of the syllables can  
461 strongly bind these sensory features, and hence improve the intelligibility of speech (*Bernstein  
462 et al., 2004; Crosse et al., 2016; Atilgan et al., 2018; O'Sullivan et al., 2020*).

## 463 **Methods**

### 464 **Terminology**

465 In the present study, several terms are used somewhat interchangeably to refer to the idea of  
466 temporal coherence, which more specifically states that neural responses that are temporally cor-  
467 related over a short period of time on a pair of sensory pathways can evoke a unified percept or  
468 "become bound" into a single stream. Sometimes the reference is made instead to the stimuli that  
469 evoke these responses, and hence terms like synchronized tone sequences or coincident events  
470 occurring over a period of time can mean the same thing as temporal coherence. In all these cases,  
471 the context will hopefully clarify the intent as it is by no means necessary that any of these stimuli  
472 can unambiguously evoke the necessary correlated activity. For instance, a single pair of synchro-

473 nized events are irrelevant to stream formation since coincidence must occur multiple times over  
474 a short interval. Similarly, synchronized bursts of random tone complexes do not evoke coherently  
475 modulated activity on any pair of frequency channels and hence do not bind. For more examples  
476 of such conditions, please see *Shamma et al. (2011)*.

## 477 **Participants**

478 76 young adults with normal-hearing (ages between 19 and 31) participated in this study, consist-  
479 ing of four experiments. 18, 14, 21, and 23 subjects participated in experiments 1-4, respectively.  
480 Experiments 1 and 3 were conducted at the University of Minnesota and experiments 2 and 4 were  
481 conducted at the University of Maryland. All participants were given course credits or monetary  
482 compensation for their participation. The experimental procedures were approved by the Univer-  
483 sity of Maryland and the University of Minnesota Institutional Review boards. Written, informed  
484 consent was obtained from each subject before the experiment.

## 485 **Data Acquisition and Stimuli Presentation**

486 Data were collected at two sites. At University of Maryland, Electroencephalogram (EEG) data were  
487 recorded using a 64-channel system (ActiCap, BrainProducts) at a sampling rate of 500 Hz with one  
488 ground electrode and referenced to the average. We used a default fabric head-cap that holds the  
489 electrodes (EasyCap, Equidistant layout).

490 EEG data from University of Minnesota were recorded from 64 scalp electrodes in an elastic cap,  
491 using a BioSemi ActiveTwo (BioSemi Instrumentation). EEG signals were acquired at a sampling  
492 rate of 512 Hz, and referenced to the average. We analyzed the EEG data offline.

493 The stimuli were designed in MATLAB and presented to the participants with the PsycTool-  
494 box (*Brainard, 1997; Pelli, 1997; Kleiner et al., 2007*). The stimuli audio was delivered to the subjects  
495 via Etymotics Research ER-2 insert earphones at a comfortable loudness level (70dB).

## 496 **Stimuli Design**

### 497 *Experiment 1:*

498 The stimulus was presented as an alternating ABAB sequence with a sampling rate of 24414 Hz,  
499 followed by a short probe-tone. Segment **A** was a harmonic tone complex with a fundamental  
500 frequency ( $F_0$ ) of 400 Hz, while **B** was a harmonic tone complex with an  $F_0$  of 600 Hz. All A and B  
501 harmonic complexes were generated with random starting phases and were low-pass filtered to  
502 exclude frequency components higher than 4000 Hz with a 48 dB/oct filter slope. Each segment of A  
503 or B lasted 90 ms, including 10-ms raised-cosine onset and offset ramps. Segments were separated  
504 by 20-ms gaps (the repetition rate of both A and B tones alone was 4.55 Hz). The total number of  
505 AB harmonic tone pairs in one trial was randomly chosen from 27 to 33, so participants could not  
506 predict the sequence's total duration. The sequence was followed by a 100-ms silent gap and a 90-  
507 ms pure-tone probe. The level of probe-tones and each component of A and B harmonic complexes  
508 were at a *rms* level of 55 dB SPL. The ending tone complex in the sequence was balanced so that  
509 half the trials ended with tone complex A. The other half ended with tone complex B (see *Figure 2A*),  
510 thus based on these structures, we defined 2 different conditions for the relative position of the

511 probe and the last complex tone in the sequence: (1) When the probe tone is a component of  
512 the last complex, and therefore it occurred at the supposedly *expected* spectral location (e.g., the  
513 sequence ended with tone complex A and we probed the frequency channel unique to complex A),  
514 and conversely (2) when the probe tone was a component of the penultimate complex tone and  
515 occurred at an *unexpected* spectral location (e.g., the sequence ended with tone complex B and we  
516 probed the frequency channel unique to complex A).

517 The experiment included six blocks of 100 trials each. Participants were instructed to selectively  
518 attend to the A tones (the higher pitch) in half the blocks and the B tones (the lower pitch) in the  
519 other half of the blocks by explicitly ask them to pay attention to the higher or lower pitch sequence.  
520 The order of blocks was randomized. The 300 trials for each set of instructions were equally divided  
521 into two groups, depending on the probe-tone used. The two probe-tones were 2000 Hz (unique  
522 frequency component of A) and 3000 Hz (unique component of B). The order of trials with different  
523 probe-tones was randomized within the three blocks for each set of instructions. We used inten-  
524 sity deviant in both A and B harmonic tones to monitor stream segregation and attention. There  
525 were 0 - 3 deviants tones in each sequence, and the number of deviants was uniformly distributed  
526 across trials. Out of 100 trials within a block, there were 25 trials with intensity deviant segments  
527 only in the A sequence, 25 trials with deviants only in the B sequence, 25 trials with deviants in  
528 both sequences, and 25 trials with no deviant. Deviant tones were presented at a level 6 dB higher  
529 than the regular tones. Participants were instructed to press a button (0, 1, 2, or 3) after hearing  
530 the probe-tone at the end of each sequence to answer how many intensity deviants they detected  
531 within the attended stream while ignoring deviants in the unattended stream. Deviants were pre-  
532 vented from occurring in the first five and last three tone pairs. To analyze the EEG data, we kept  
533 the trials in which participants reported correctly, e.g., the exact number of deviants in the target  
534 sequence.

### 535 *Experiment 2:*

536 The auditory scene consisted of two complex tones denoted as A and B and presented at a sam-  
537 pling rate of 44100 Hz, 90 ms in duration, 10 ms cosine ramp, and 150 ms onset-to-onset interval  
538 for tone complex A (6.67 Hz repetition rate) and 250 ms interval for tone complex B (4 Hz repeti-  
539 tion rate). Each complex tone consisted of 5 predefined inharmonic frequencies with one shared  
540 frequency component between the two complexes ( $F_A=[150, 345, 425, 660, 840]$  Hz and  $F_B=[250,$   
541  $425, 775, 1025, 1175]$  Hz). The two sequences were presented at different rates but converged on  
542 the last tone in the sequence. A single frequency probe-tone replaced the converged tones; thus,  
543 the probe-tone always occurred at the expected location (see descriptions for experiment 1). The  
544 probe-tone was centered at the frequency that was shared between the two complexes (425 Hz)  
545 or at a frequency unique to complex A (660 Hz) or complex B (775 Hz). The participants were in-  
546 structed to pay attention to a complex sequence that was included in the priming epoch and report  
547 whether they heard an intensity deviant (5 dB increase in the loudness) only in the target sequence,  
548 with a 20% chance of having a deviant in complex A sequence and independently 20% chance of  
549 having a deviant in the sequence of complex B. Deviant was prevented from occurring in the first  
550 and last two tones; to analyze the EEG data, we only kept the trials in which participants reported

551 correctly (i.e., all trials with missed and false alarms were discarded). Each trial started with a target  
552 stream alone (priming), and after three bursts, the distractor stream was added (*Figure 3A*). The  
553 priming phase was balanced for all trials, so half the trials started with tone complex A, and the  
554 other half started with tone complex B. Trials duration were uniformly distributed between 3.5-5  
555 sec to avoid the formation of expectation of the ending.

556 The experiment was conducted in six blocks of 100 trials, and attention was fixed on one stream  
557 throughout an entire block. The probe-tone frequency was uniformly selected from [425 Hz, 660  
558 Hz, 775 Hz] for all trials. Before neural data collection, a training module was provided. Subjects  
559 received feedback after each trial for both training and the test sets.

#### 560 *Experiment 3:*

561 This experiment consisted of a narrowband noise sequence with a passband of 2-3 kHz. The noise  
562 was accompanied by two inharmonic complex sequences, with one of them coherent with the  
563 noise sequence, and the other complex was alternating. We used the same frequency components  
564 as *experiment 2* for both inharmonic complexes ( $F_A=[150, 345, 425, 660, 840]$  Hz and  $F_B=[250, 425,$   
565  $775, 1025, 1175]$  Hz presented at a sampling rate of 24414 Hz, and a level of 70 dB). Each noise  
566 segment and tone complex was 125 ms in duration, including a 15 ms offset and onset cosine  
567 ramp with a 250 ms onset-to-onset time interval for all tones. We used 0 - 3 (with equal proba-  
568 bility) intensity deviants, a 6dB increase in amplitude, both in the target of attention (noise) and  
569 the distractor (alternating complex). The subjects' task was always to pay attention to the noise se-  
570 quence and count the number of intensity deviants only in the attention target (noise). To analyze  
571 the EEG data, we only kept the trials where subjects reported the *exact* number of deviants. The  
572 trials' duration was uniformly distributed between 3.5-5 secs, so participants could not form an  
573 expectation for the sequence's total duration. We inserted a single frequency probe-tone 125 ms  
574 after the last tone complex in the sequence. The probe-tone was at the frequency shared between  
575 the two complexes (425 Hz) or was unique to complex A (660 Hz) or complex B (775 Hz). To ensure  
576 that the EEG response to the last complex tone does not affect the probe-tone response under  
577 different attention conditions, trials ended with complex tone A when the probe-tone was unique  
578 to B and ended with complex tone B when the probe-tone was unique to A.

579 The experiment was conducted in six blocks of 100 trials. For 3 blocks, complex A and the rest  
580 of the blocks complex B were coherent with the noise sequence. The probe-tone frequency was  
581 uniformly selected from [425 Hz, 660 Hz, 775 Hz] for all trials within a block. Before neural data  
582 collection, a training module was provided. Subjects received feedback after each trial for both  
583 training and test sets.

#### 584 *Experiment 4:*

585 We used the CRM speech corpus (*Bolia et al., 2000*) for this experiment. In general, this speech  
586 database consists of 8 different speakers (4 female), and the format of each speech sentences is:  
587 "Ready [Callsign] go to [Color] [Number] now". The callsign set is: 'Charlie', 'Ringo', 'Laker', 'Hopper',  
588 'Arrow', 'Tiger', 'Eagle', 'Baron'. The color set is: 'Blue', 'Red', 'White', 'Green', and the number set  
589 is: {1, 2, 3, 4, 5, 6, 7, 8}. Therefore, each speaker has 256 unique sentences. Two speakers (one

590 female and one male) were chosen for the task. We manipulated each sentence's duration, so all  
591 the sentences had the same length (1.8 seconds at a sampling rate of 40000 Hz), and on average,  
592 the Callsign occurred  $300 \pm 25$  ms after the speech onset.

593 For both parts, we only kept the trials in which participants reported correctly for the EEG anal-  
594 ysis, i.e., if the listeners' reports matched with the color or number uttered by the target speaker  
595 (see below).

596 **Part a)** During the task, the auditory scene consisted of two concurrent speech streams - we  
597 constrained the mixtures to have different 'callsigns', 'colors' or 'numbers' in male and female voices  
598 - that were followed by a probe-tone with complex harmonics. The probe tone's harmonic frequen-  
599 cies were aligned with the 4 loudest harmonic frequencies of either male or female voice at the  
600 end of the sentences; therefore, the probe-tone was unique to male or unique to female voices.  
601 The probe's duration was 90ms, with a 10 ms cosine ramp, and played after a 10ms interval right  
602 after the sentences (**Figure 5A**). The experiment was conducted in 4 blocks with 100 trials. Partici-  
603 pants fixed their attention on either male or female voice for 100 trials in a given block, and they  
604 reported the color or the number of the attended speaker that was asked randomly at the end of  
605 each trial. The order of the blocks was shuffled across subjects.

606 **Part b)** In the second part of the experiment, we inserted a single frequency probe-tone in the  
607 middle, following 600 ms of the speech onset and around 300 ms after the callsign onset. The  
608 probe-tone was 90 ms in duration, including a 10 ms cosine ramp, followed by a 10 ms gap of  
609 silence. The frequency of the probe-tone was aligned with the 2<sup>nd</sup> harmonic of the female voice  
610 (unique to female, average  $F_F = 391 Hz$ ) or the 3<sup>rd</sup> harmonic of the male voice (unique to male,  
611 average  $F_M = 288 Hz$ ). On average, the callsign occurred  $300ms \pm 25ms$  after speech onset. Although  
612 the probe tone was presented in the speech, the speech mixture was masked by complete silence  
613 for the probe-tone duration. The experiment was conducted in a block of 400 trials, and partici-  
614 pants were instructed to pay attention to the speaker who uttered the target callsign ('Ringo') and  
615 report either the color or number (randomly selected for each trial) spoken by the target voice, at  
616 the end of each trial.

## 617 EEG Preprocessing

618 After loading, EEG data were mean-centered. The bad channels were interpolated based on the  
619 data from the neighbor channels. The slow varying trend in data was removed by robust fitting a  
620 polynomial (*de Cheveigné and Arzounian, 2018*). For the DSS analysis (see below *subsection*), data  
621 were bandpass filtered between 1 Hz to 20 Hz with Butterworth window of order 4 using 'filtfilt' in  
622 MATLAB. Eyeblink components were isolated and projected out with the HEOG and VEOG channels  
623 using a time-shift PCA (*de Cheveigné and Simon, 2007*). Data were referenced by subtracting the  
624 robust mean and epoched based on the triggers sent at the beginning of each trial. Finally, the  
625 outlier trials (bad epochs) were manually detected and discarded based on a threshold criterion.

## 626 Decoding

627 Decoding analysis was performed using sci-kitlearn (*Pedregosa et al., 2011*) and MNE (*Gramfort*  
628 *et al., 2013*) libraries in python 3.6. We trained linear classifiers on EEG sensor space signals, band-

629 passed 0.1-20 Hz at 250 Hz sampling frequency (*King and Dehaene, 2014*). At each time point  $t$ , we  
630 trained a classifier using the matrix of observations  $X_t \in \mathbb{R}^{N \times 64}$ , for 64 electrodes in  $N$  samples, to  
631 predict the vector of labels  $y_{t'} \in \{0, 1\}^N$  at every time point  $t'$  in a trial. The labels correspond to  
632 the two attention conditions (attend A versus attend B in experiment 1, 2, and 3 or attend female  
633 versus attend male in experiment 4). For example, for each subject, we trained the decoders on  
634 EEG signals at time points encompassing the probe tone (-100 ms – 500 ms). Therefore, the decoder  
635 at each time point learns to predict the attended stream using the EEG sensor topography at the  
636 same time point. Then, we generalized the trained decoder by testing it on all other time points of  
637 the trial. Logistic regression classifiers were used, with 5-fold cross-validation, within-subject for  
638 all the trials. We used the area under the receiver operating characteristic curve (AUC) to quantify  
639 the classifiers' performance.

640 In summary, within a subject, the classifiers' scores imply the robustness of the attentional  
641 effects on the probe-tone response topography. So the significant time regions in all figures corre-  
642 sponding to decoder scores indicate the effect's consistency across all subjects.

### 643 **Denosing Source Separation (DSS)**

644 A set of spatial filters are synthesized using a blind source separation method that allows the mea-  
645 surement of interest to guide the source separation. For detailed explanation see *De Cheveigné*  
646 *and Simon (2008)*. For our purpose, the Denoised Source Separation (DSS) filter's output is the  
647 weighted sum of the signals from the 64 EEG electrodes, in which the weights are optimized to  
648 extract the repeated neural activity across trials. Therefore, for the experiment 1, 2, and 3, the  
649 first DSS component reflects a brain source of auditory processing, repeatedly evoked during the  
650 segregation task for the same set of sound frequencies.

651 Our use of the DSS method required a large number of the same stimuli to extract the repeated  
652 activity. However, in our speech experiment (experiment 4a and 4b), since each trial consisted of  
653 various sentences with varying sound frequencies, different neural activities were driven by the  
654 stimulus in different trials; therefore, it is difficult to isolate the first DSS component as we did  
655 for tone experiments. Thereby, we only used the DSS method in order to denoise the data in  
656 experiment 4, in which we projected back the first 5 DSS components to the sensor space to form  
657 a clean and denoised dataset. Finally, we compared the evoked responses at the Cz channel (placed  
658 on the center of the mid-line sagittal plane) for experiment 4.

### 659 **Statistical Analysis**

660 Statistical analysis for the decoders was performed with a one-sample t-test with random-effect  
661 Monte-Carlo cluster statistics for multiple comparison correction using the default parameters  
662 of the MNE spatio\_temporal\_cluster\_1samp\_test function (*Maris and Oostenveld, 2007*). To com-  
663 pare the differences in evoked responses due to the probe-tones, we performed bootstrap resam-  
664 pling to estimate the standard deviation (SD) of the difference between the attention conditions.  
665 We checked whether at each time point the difference between attention conditions exceeded  
666  $2 \times$  estimated SD ( $2\sigma$ ). In supplement figures, for the first DSS component's strength comparison  
667 between two attention conditions, we used a one-tail non-parametric Wilcoxon signed-rank test

668 (*Wilcoxon, 1945*). Error bars in all figures are  $\pm$ SEM (standard error of the mean).

## 669 Acknowledgments

670 We are grateful to Andrew Oxenham and Hao Lu for their critical contributions in the earlier stages  
671 of this work, the experiments' design, and comments, and inspiring conversations regarding the  
672 manuscript. We also thank Claire Pelofi, Hao Lu, Maya Pillai, Claire Asenso, Aaron Merlos, and  
673 Maiah Xayavong for their assistance in data collection. This research was funded by grants from  
674 the National Institutes of Health (R01 DC016119 and U01 AG058532), National Science Foundation  
675 (1764010), and the Air Force Office of Scientific Research (FA9550-16-1-0036).

## 676 References

- 677 **Atilgan H**, Bizley JK. Training enhances the ability of listeners to exploit visual information for au-  
678 ditory scene analysis. *Cognition*. 2021 mar; 208. <https://pubmed.ncbi.nlm.nih.gov/33373937/>, doi:  
679 [10.1016/j.cognition.2020.104529](https://doi.org/10.1016/j.cognition.2020.104529).
- 680 **Atilgan H**, Town S, Wood K, Jones G, Maddox R, Lee AK, Bizley J. Integration of Visual Information in Auditory  
681 Cortex Promotes Auditory Scene Analysis through Multisensory Binding. *Neuron*. 2018 01; 97:640–655. doi:  
682 [10.1016/j.neuron.2017.12.034](https://doi.org/10.1016/j.neuron.2017.12.034).
- 683 **Bernstein L**, Auer E, Takayanagi S. Auditory speech detection in noise enhanced by lipreading. *Speech Com-*  
684 *munication*. 2004 10; 44:5–18. doi: [10.1016/j.specom.2004.10.011](https://doi.org/10.1016/j.specom.2004.10.011).
- 685 **Bizley JK**, Maddox RK, Lee AKC. Defining Auditory-Visual Objects: Behavioral Tests and Physiolog-  
686 ical Mechanisms. *Trends in Neurosciences*. 2016 feb; 39(2):74–85. </pmc/articles/PMC4738154/>  
687 </pmc/articles/PMC4738154/?report=abstracthttps://www.ncbi.nlm.nih.gov/pmc/articles/PMC4738154/>, doi:  
688 [10.1016/j.tins.2015.12.007](https://doi.org/10.1016/j.tins.2015.12.007).
- 689 **Bolia R**, Nelson W, Ericson M, Simpson B. A speech corpus for multitalker communications research. *The*  
690 *Journal of the Acoustical Society of America*. 2000 03; 107:1065–6. doi: [10.1121/1.428288](https://doi.org/10.1121/1.428288).
- 691 **Brainard DH**. The Psychophysics Toolbox. *Spatial Vision*. 1997; 10(4):433–436. [https://brill.com/view/journals/](https://brill.com/view/journals/sv/10/4/article-p433_15.xml)  
692 [sv/10/4/article-p433\\_15.xml](https://brill.com/view/journals/sv/10/4/article-p433_15.xml), doi: <https://doi.org/10.1163/156856897X00357>.
- 693 **Bregman AS**, Liao C, Levitan R. Auditory grouping based on fundamental frequency and formant  
694 peak frequency. *Canadian journal of psychology*. 1990; 44(3):400–413. </record/1991-06393-001>, doi:  
695 [10.1037/h0084255](https://doi.org/10.1037/h0084255).
- 696 **Bregman A**. Auditory Scene Analysis: The Perceptual Organization of Sound. *Journal of The Acoustical Society*  
697 *of America - J ACOUST SOC AMER*. 1990 01; 95:250. doi: [10.1121/1.408434](https://doi.org/10.1121/1.408434).
- 698 **Bregman AS**, Campbell J. Primary auditory stream segregation and perception of order in rapid sequences of  
699 tones. *Journal of Experimental Psychology*. 1971; 89(2):244–249. [http://doi.apa.org/getdoi.cfm?doi=10.1037/](http://doi.apa.org/getdoi.cfm?doi=10.1037/h0031163)  
700 [h0031163](https://doi.org/10.1037/h0031163), doi: [10.1037/h0031163](https://doi.org/10.1037/h0031163).
- 701 **Brungart DS**, Simpson BD, Ericson MA, Scott KR. Informational and energetic masking effects in the perception  
702 of multiple simultaneous talkers. *The Journal of the Acoustical Society of America*. 2001; 110(5):2527–2538.  
703 <https://doi.org/10.1121/1.1408946>, doi: [10.1121/1.1408946](https://doi.org/10.1121/1.1408946).
- 704 **Carlyon R**, Thompson S, Heinrich A, Pulvermüller F, Davis M, Shtyrov Y, Cusack R, Johnsrude I. 47. In: *Objective*  
705 *Measures of Auditory Scene Analysis* Springer, New York, NY; 2010. p. 507–519. doi: [10.1007/978-1-4419-](https://doi.org/10.1007/978-1-4419-5686-6_47)  
706 [5686-6\\_47](https://doi.org/10.1007/978-1-4419-5686-6_47).

- 707 **de Cheveigné A**, Arzounian D. Robust detrending, rereferencing, outlier detection, and inpainting for mul-  
708 tichannel data. *NeuroImage*. 2018 may; 172:903–912. [https://www.sciencedirect.com/science/article/pii/](https://www.sciencedirect.com/science/article/pii/S1053811918300351)  
709 [S1053811918300351](https://www.sciencedirect.com/science/article/pii/S1053811918300351), doi: 10.1016/j.NEUROIMAGE.2018.01.035.
- 710 **de Cheveigné A**, Simon JZ. Denoising based on time-shift PCA. *Journal of Neuroscience Methods*. 2007 sep;  
711 165(2):297–305. doi: 10.1016/j.jneumeth.2007.06.003.
- 712 **Choi I**, Rajaram S, Varghese L, Shinn-Cunningham B. Quantifying attentional modulation of auditory-evoked  
713 cortical responses from single-trial electroencephalography. *Frontiers in human neuroscience*. 2013 04;  
714 7:115. doi: 10.3389/fnhum.2013.00115.
- 715 **Crosse MJ**, Di Liberto GM, Lalor EC. Eye Can Hear Clearly Now: Inverse Effectiveness in Natural Audiovisual  
716 Speech Processing Relies on Long-Term Crossmodal Temporal Integration. *Journal of Neuroscience*. 2016;  
717 36(38):9888–9895. <https://www.jneurosci.org/content/36/38/9888>, doi: 10.1523/JNEUROSCI.1396-16.2016.
- 718 **De Cheveigné A**, Parra LC. Joint decorrelation, a versatile tool for multichannel data analy-  
719 sis. *NeuroImage*. 2014; 98:487–505. <http://dx.doi.org/10.1016/j.neuroimage.2014.05.068>, doi:  
720 10.1016/j.neuroimage.2014.05.068.
- 721 **De Cheveigné A**, Simon JZ. Denoising based on spatial filtering. *Journal of Neuroscience Methods*. 2008;  
722 171(2):331–339. doi: 10.1016/j.jneumeth.2008.03.015.
- 723 **Ding N**, Simon JZ. Emergence of neural encoding of auditory objects while listening to competing speakers. Pro-  
724 ceedings of the National Academy of Sciences. 2012; 109(29):11854–11859. [https://www.pnas.org/content/](https://www.pnas.org/content/109/29/11854)  
725 [109/29/11854](https://www.pnas.org/content/109/29/11854), doi: 10.1073/pnas.1205381109.
- 726 **Elhilali M**, Ma L, Micheyl C, Oxenham AJ, Shamma SA. Temporal Coherence in the Perceptual Organization and  
727 Cortical Representation of Auditory Scenes. *Neuron*. 2009; 61(2):317–329. [http://dx.doi.org/10.1016/j.neuron.](http://dx.doi.org/10.1016/j.neuron.2008.12.005)  
728 [2008.12.005](http://dx.doi.org/10.1016/j.neuron.2008.12.005), doi: 10.1016/j.neuron.2008.12.005.
- 729 **Gramfort A**, Luessi M, Larson E, Engemann D, Strohmeier D, Brodbeck C, Goj R, Jas M, Brooks T, Parkkonen  
730 L, Hämäläinen M. MEG and EEG data analysis with MNE-Python. *Frontiers in Neuroscience*. 2013; 7:267.  
731 <https://www.frontiersin.org/article/10.3389/fnins.2013.00267>, doi: 10.3389/fnins.2013.00267.
- 732 **Grimault N**, Micheyl C, Carlyon RP, Arthaud P, Collet L. Perceptual auditory stream segregation of sequences  
733 of complex sounds in subjects with normal and impaired hearing. *British journal of audiology*. 2001 07;  
734 35:173–82. doi: 10.1080/00305364.2001.11745235.
- 735 **King JR**, Dehaene S. Characterizing the dynamics of mental representations: the temporal generalization  
736 method. *Trends in Cognitive Sciences*. 2014 apr; 18(4):203–210. [https://www.sciencedirect.com/science/](https://www.sciencedirect.com/science/article/pii/S1364661314000199)  
737 [article/pii/S1364661314000199](https://www.sciencedirect.com/science/article/pii/S1364661314000199), doi: 10.1016/J.TICS.2014.01.002.
- 738 **King JR**, Pescetelli N, Dehaene S. Brain Mechanisms Underlying the Brief Maintenance of Seen and Unseen  
739 Sensory Information. *Neuron*. 2016 12; 92:1122–1134. doi: 10.1016/j.neuron.2016.10.051.
- 740 **Kleiner M**, Brainard DH, Pelli DG, Broussard C, Wolf T, Niehorster D. What's new in Psychtoolbox-3? A free  
741 cross-platform toolkit for psychophysiscs with Matlab and GNU/Octave; 2007.
- 742 **Krishnan L**, Elhilali M, Shamma S. Segregating Complex Sound Sources through Temporal Coherence. *PLoS*  
743 *Computational Biology*. 2014; 10(12). doi: 10.1371/journal.pcbi.1003985.
- 744 **Krogholt Christiansen S**, Oxenham AJ. Assessing the effects of temporal coherence on auditory stream for-  
745 mation through comodulation masking release. *The Journal of the Acoustical Society of America*. 2014;  
746 135(6):3520–3529. <https://www.ncbi.nlm.nih.gov/pmc/articles/PMC4048442/>, doi: 10.1121/1.4872300.



- 747 **Lee SH**, Blake R. Visual Form Created Solely from Temporal Structure. *Science* (New York, NY). 1999 06;  
748 284:1165–8. doi: [10.1126/science.284.5417.1165](https://doi.org/10.1126/science.284.5417.1165).
- 749 **Lu K**, Xu Y, Yin P, Oxenham AJ, Fritz JB, Shamma SA. Temporal coherence structure rapidly shapes neuronal in-  
750 teractions. *Nature Communications*. 2017; 8:13900. <http://www.nature.com/doifinder/10.1038/ncomms13900>,  
751 doi: 10.1038/ncomms13900.
- 752 **Maris E**, Oostenveld R. Nonparametric statistical testing of EEG- and MEG-data. *Journal of Neuroscience*  
753 *Methods*. 2007; 164(1):177 – 190. <http://www.sciencedirect.com/science/article/pii/S0165027007001707>, doi:  
754 <https://doi.org/10.1016/j.jneumeth.2007.03.024>.
- 755 **Mesgarani N**, Chang EF. Selective cortical representation of attended speaker in multi-talker speech perception.  
756 *Nature*. 2012; 485(7397):233–6. [http://www.pubmedcentral.nih.gov/articlerender.fcgi?artid=3870007&tool=](http://www.pubmedcentral.nih.gov/articlerender.fcgi?artid=3870007&tool=pmcentrez&rendertype=abstract)  
757 [pmcentrez&rendertype=abstract](http://www.pubmedcentral.nih.gov/articlerender.fcgi?artid=3870007&tool=pmcentrez&rendertype=abstract), doi: 10.1038/nature11020.
- 758 **Micheyl C**, Hanson C, Demany L, Oxenham AJ, Shamma S. Auditory stream segregation for alternating and syn-  
759 chronous tones. *Journal of Experimental Psychology: Human Perception and Performance*. 2013; 39(6):1568–  
760 1580. <https://pubmed.ncbi.nlm.nih.gov/23544676/>, doi: 10.1037/a0032241.
- 761 **Micheyl C**, Kreft H, Shamma S, Oxenham AJ. Temporal coherence versus harmonicity in auditory stream for-  
762 mation. *The Journal of the Acoustical Society of America*. 2013; 133(3):EL188–EL194. [https://www.ncbi.nlm.](https://www.ncbi.nlm.nih.gov/pmc/articles/PMC3579859/)  
763 [nih.gov/pmc/articles/PMC3579859/](https://www.ncbi.nlm.nih.gov/pmc/articles/PMC3579859/), doi: 10.1121/1.4789866.
- 764 **Micheyl C**, Oxenham AJ. Objective and subjective psychophysical measures of auditory stream integration  
765 and segregation. *JARO - Journal of the Association for Research in Otolaryngology*. 2010; 11(4):709–724.  
766 <http://www.tc.umn.edu/~cmicheyl/demos.html>, doi: 10.1007/s10162-010-0227-2.
- 767 **Middlebrooks JC**, Simon JZ, Popper AN, Editors RRF. *The Auditory System at the Cocktail Party*, vol. 60. Springer  
768 *Handbook of Auditory research*; 2017. <http://link.springer.com/10.1007/978-3-319-51662-2>, doi: 10.1007/978-  
769 3-319-51662-2.
- 770 **Moore B**, Gockel H. Factors Influencing Sequential Stream Segregation. *Acta Acustica united with Acustica*.  
771 2002 05; 88:320–333.
- 772 **O’Sullivan AE**, Crosse MJ, Di Liberto GM, de Cheveigné A, Lalor EC. Neurophysiological indices of audiovisual  
773 speech integration are enhanced at the phonetic level for speech in noise. *bioRxiv*. 2020; [https://www.biorxiv.](https://www.biorxiv.org/content/early/2020/04/20/2020.04.18.048124)  
774 [org/content/early/2020/04/20/2020.04.18.048124](https://www.biorxiv.org/content/early/2020/04/20/2020.04.18.048124), doi: 10.1101/2020.04.18.048124.
- 775 **O’Sullivan J**, Herrero J, Smith E, Schevon C, McKhann GM, Sheth SA, Mehta AD, Mesgarani N. Hierarchical En-  
776 coding of Attended Auditory Objects in Multi-talker Speech Perception. *Neuron*. 2019; 104(6):1195–1209.e3.  
777 <https://doi.org/10.1016/j.neuron.2019.09.007>, doi: 10.1016/j.neuron.2019.09.007.
- 778 **O’Sullivan JA**, Shamma SA, Lalor EC. Evidence for Neural Computations of Temporal Coherence in an Auditory  
779 Scene and Their Enhancement during Active Listening. *Journal of Neuroscience*. 2015; 35(18):7256–7263.  
780 <https://www.jneurosci.org/content/35/18/7256>, doi: 10.1523/JNEUROSCI.4973-14.2015.
- 781 **Pedregosa F**, Varoquaux G, Gramfort A, Michel V, Thirion B, Grisel O, Blondel M, Prettenhofer P, Weiss R,  
782 Dubourg V, Vanderplas J, Passos A, Cournapeau D, Brucher M, Perrot M, Édouard Duchesnay. Scikit-  
783 learn: Machine Learning in Python. *Journal of Machine Learning Research*. 2011; 12(85):2825–2830. [http:](http://jmlr.org/papers/v12/pedregosa11a.html)  
784 [//jmlr.org/papers/v12/pedregosa11a.html](http://jmlr.org/papers/v12/pedregosa11a.html).
- 785 **Pelli DG**. The VideoToolbox software for visual psychophysics: transforming numbers into movies.  
786 *Spatial Vision*. 1997; 10(4):437–442. [https://brill.com/view/journals/sv/10/4/article-p437\\_16.xml](https://brill.com/view/journals/sv/10/4/article-p437_16.xml), doi:  
787 <https://doi.org/10.1163/156856897X00366>.

- 788 **Pinheiro-Chagas P**, Piazza M, Dehaene S. Decoding the processing stages of mental arithmetic with magne-  
789 toencephalography. *Cortex*. 2018 jul; <https://www.sciencedirect.com/science/article/pii/S0010945218302351>,  
790 doi: 10.1016/J.CORTEX.2018.07.018.
- 791 **Power A**, Foxe J, Forde EJ, Reilly R, Lalor E. At what time is the cocktail party? A late locus of selective atten-  
792 tion to natural speech. *The European journal of neuroscience*. 2012 03; 35:1497–503. doi: 10.1111/j.1460-  
793 9568.2012.08060.x.
- 794 **Shamma S**, Elhilali M. 2. In: Fritzsche B, editor. Chapter: Binding, Scene Analysis and Higher Cortical Centers  
795 in *The Senses: A Comprehensive Reference, 2nd Edition* ELSEVIER ACADEMIC Press; 2020. <https://books.google.com/books?id=kLNWzQEACAAJ>.  
796
- 797 **Shamma SA**, Elhilali M, Micheyl C. Temporal coherence and attention in auditory scene analysis. *Trends in Neu-*  
798 *rosciences*. 2011; 34(3):114–123. <http://dx.doi.org/10.1016/j.tins.2010.11.002>, doi: 10.1016/j.tins.2010.11.002.
- 799 **Singh PG**. Perceptual organization of complex-tone sequences: A tradeoff between pitch and timbre. *Journal*  
800 *of the Acoustical Society of America*. 1987; 82(3):886–899. <https://pubmed.ncbi.nlm.nih.gov/3655122/>, doi:  
801 10.1121/1.395287.
- 802 **Snyder J**, Alain C, Picton T. Effects of Attention on Neuroelectric Correlates of Auditory Stream Segregation.  
803 *Journal of cognitive neuroscience*. 2006 02; 18:1–13. doi: 10.1162/089892906775250021.
- 804 **Stokes M**, Wolff M, Spaak E. Decoding Rich Spatial Information with High Temporal Resolution. *Trends in*  
805 *Cognitive Sciences*. 2015 11; 19:636–638. doi: 10.1016/j.tics.2015.08.016.
- 806 **Sussman ES**. Auditory Scene Analysis: An Attention Perspective. *Journal of Speech, Language, and Hear-*  
807 *ing Research*. 2017; 60(10):2989–3000. [https://pubs.asha.org/doi/abs/10.1044/2017\\_JSLHR-H-17-0041](https://pubs.asha.org/doi/abs/10.1044/2017_JSLHR-H-17-0041), doi:  
808 10.1044/2017\_JSLHR-H-17-0041.
- 809 **Teki S**, Barascud N, Picard S, Payne C, Griffiths TD, Chait M. Neural Correlates of Auditory Figure-Ground  
810 Segregation Based on Temporal Coherence. *Cerebral Cortex (New York, NY)*. 2016; 26(9):3669. <https://www.ncbi.nlm.nih.gov/pmc/articles/PMC5004755/>, doi: 10.1093/CERCOR/BHW173.
- 811
- 812 **Teki S**, Chait M, Kumar S, Shamma S, Griffiths TD. Segregation of complex acoustic scenes based on temporal  
813 coherence. *eLife*. 2013 jul; 2013(2). <https://elifesciences.org/articles/00699>, doi: 10.7554/eLife.00699.
- 814 **Wilcoxon F**. Individual Comparisons by Ranking Methods. *Biometrics Bulletin*. 1945; 1(6):80–83. <http://www.jstor.org/stable/3001968>.  
815
- 816 **Wolff M**, Jochim J, Akyürek E, Stokes M. Dynamic hidden states underlying working-memory-guided behavior.  
817 *Nature Neuroscience*. 2017 04; 20. doi: 10.1038/nn.4546.
- 818 **Xiang J**, Simon J, Elhilali M. Competing Streams at the Cocktail Party: Exploring the Mechanisms of Attention  
819 and Temporal Integration. *Journal of Neuroscience*. 2010; 30(36):12084–12093. <https://www.jneurosci.org/content/30/36/12084>, doi: 10.1523/JNEUROSCI.0827-10.2010.  
820
- 821 **Zera J**, Green DM. Effect of signal component phase on asynchrony discrimination. *The Journal of the Acoustical*  
822 *Society of America*. 1995; 98(2):817–827. <https://doi.org/10.1121/1.413508>, doi: 10.1121/1.413508.
- 823 **Zera S**. Detecting temporal onset and offset asynchrony in multicomponent complexes. *Journal of*  
824 *the Acoustical Society of America*. 1993; 93(2):1038–1052. <https://pubmed.ncbi.nlm.nih.gov/8445115/>, doi:  
825 10.1121/1.405552.

## # of intensity deviants - Subjects response

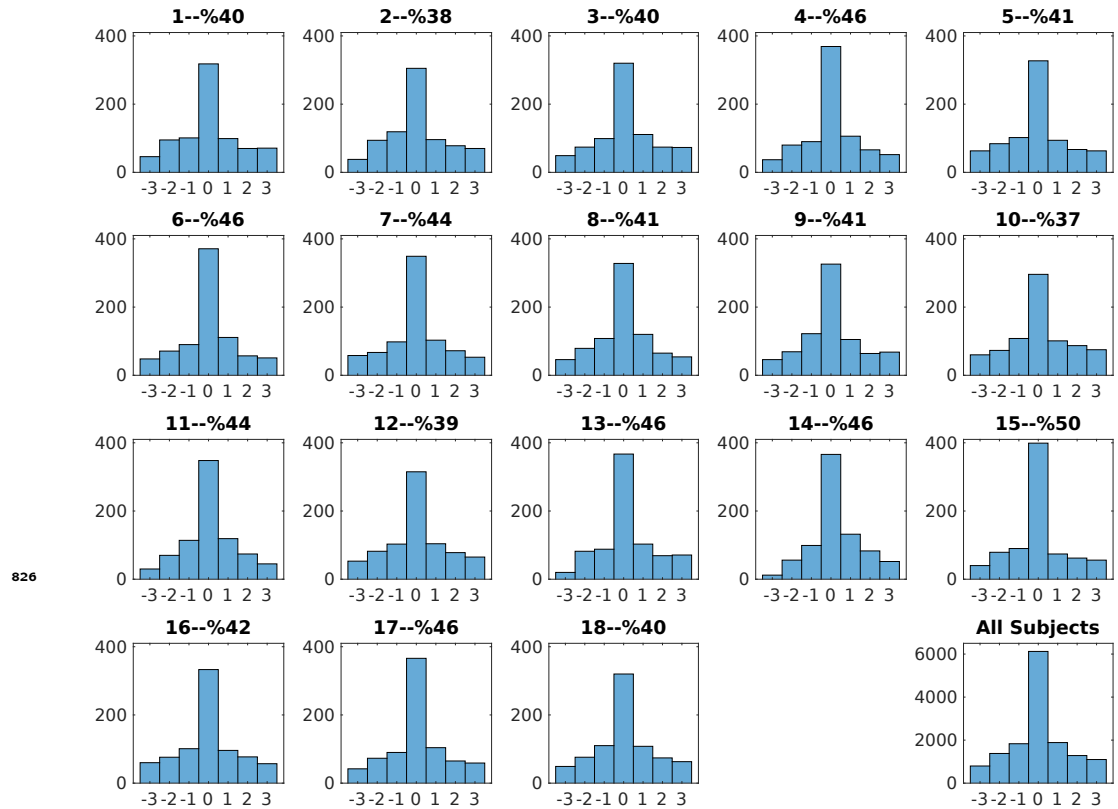

**Figure 2-Figure supplement 1. Behavioral Results.** In this experiment, listeners were instructed to count the number of deviants in the target (attended) sequence, which was uniformly distributed between 0-3 (four choices) across trials, and hence, the chance level was at %25. Each subplot shows the histogram of the true number of deviants minus the subject's response. Therefore, in these subplots, "0" means the correct response (hit), positive numbers mean that listeners missed one or some of the deviants, and negatives mean response was larger than the actual number of deviants. Each subplot's title includes the subject's number followed by their percentage of correct answers (hit rate). All the subjects performed above the chance level.

## A. Expected

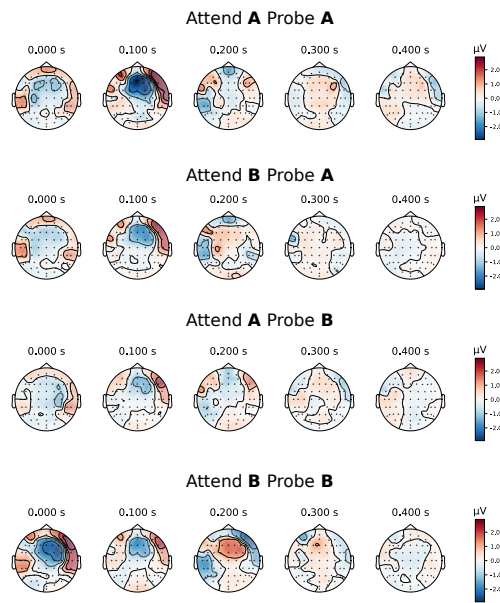

## B. Unexpected

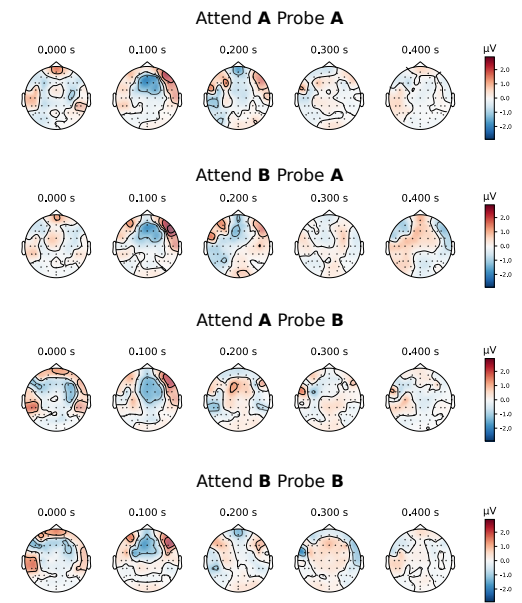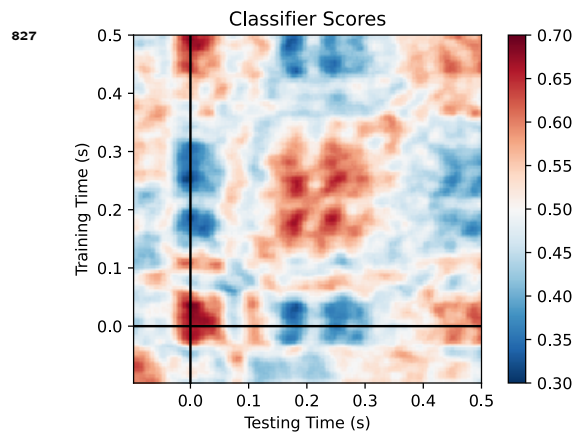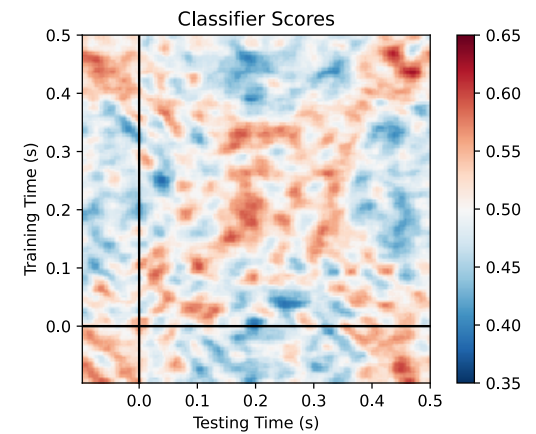

**Figure 2-Figure supplement 2. A subject example.** Topomaps of probe A and probe B is plotted for different attentional conditions for **(A) Expected** and **(B) Unexpected** cases. Linear classifiers were trained at each time point on the responses from all 64 channels (topomaps) in order to decode the focus of attention. At the subject level, the trained classifier could capture the differences in the topomap patterns caused by the attentional changes, e.g., the differences between the topomaps of *Attend A probe A* and *Attend B Probe A*. The classifier scores showed the robustness of the effect for a given subject across all trials; in the second-level test (depicted in **Figure 2B**), we showed the robustness of the effect sizes across all subjects.

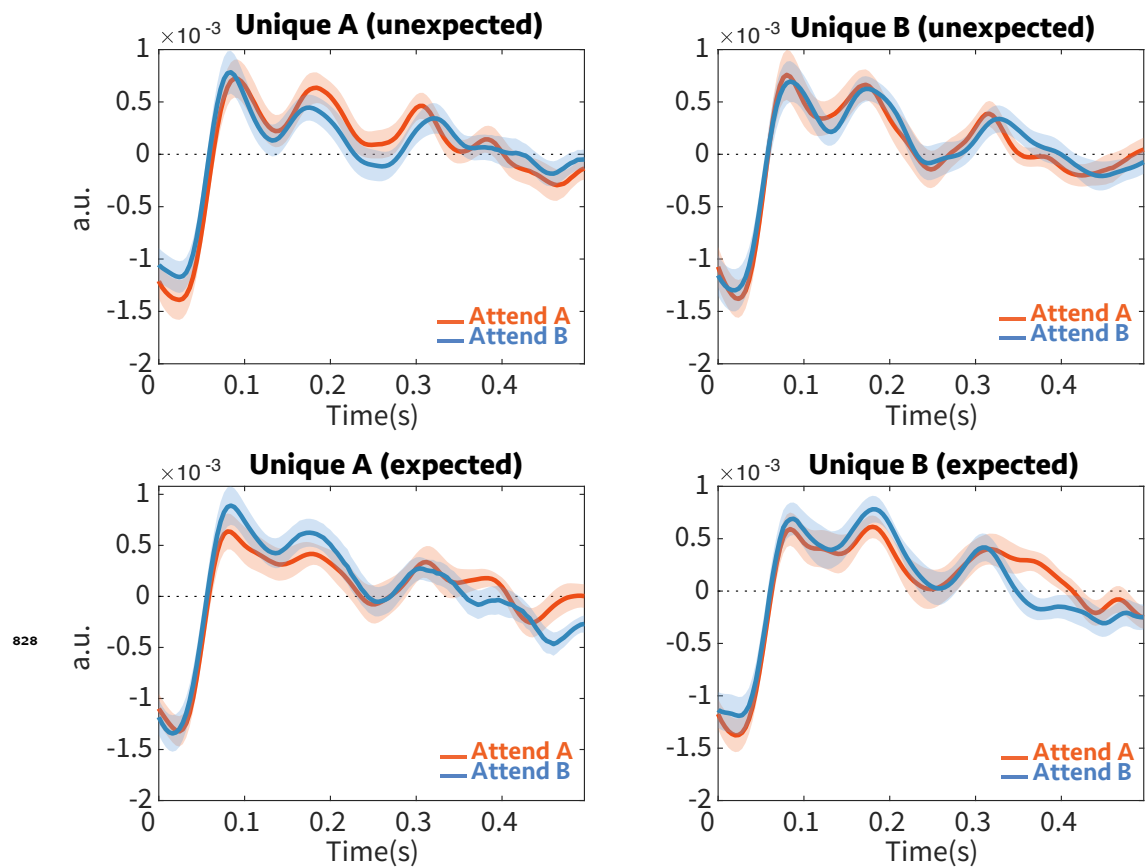

**Figure 2-Figure supplement 3. DSS evoked response.** The preprocessed EEG data were submitted to the DSS method (see Methods section ) using the average across trials as a bias filter. The aim was to isolate the most repeatable auditory component by applying a spatial filter. The grand average for the first DSS component is depicted here for probe tones unique to tone complex A (unique A) and tone complex B (unique B) under attend A and attend B conditions, with the onset of the probe at zero. In Figure 2C, we subtracted the orange and blue curves in the top-left panel from the same colors on the top-right panel and compared the difference for attend A and attend B. Since attention enhanced the attended probe and suppressed the unattended probe, the probe responses' difference should have had opposite polarity.

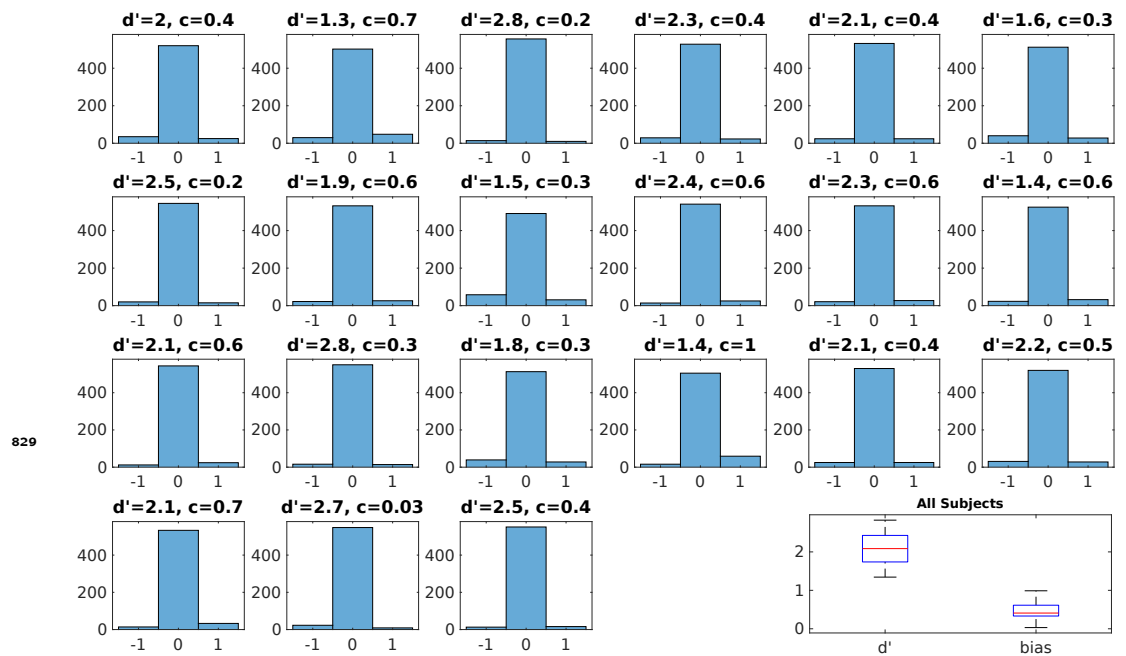

**Figure 3-Figure supplement 1. Behavioral Results.** In this experiment, listeners were instructed to detect a deviant in the target (attended) sequence. Each subplot shows the histogram of a deviant's presence (0 or 1) minus the subject's response. Therefore, in these subplots, "0" means the correct response (hit), +1 means listeners missed the deviant, and -1 reflects the false alarms. The title of each subplot includes the subject's  $d'$  prime followed by their bias.

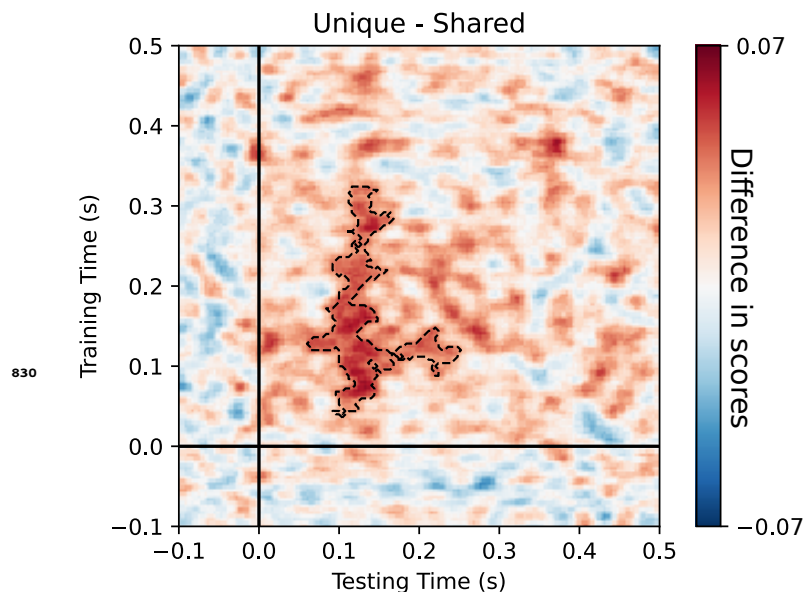

**Figure 3-Figure supplement 2.** Scores show the average difference between decoding scores of Unique and Shared probe-tone for all subjects. The difference is significant for the time region contoured between the dashed lines ( $p = 0.009$ ).

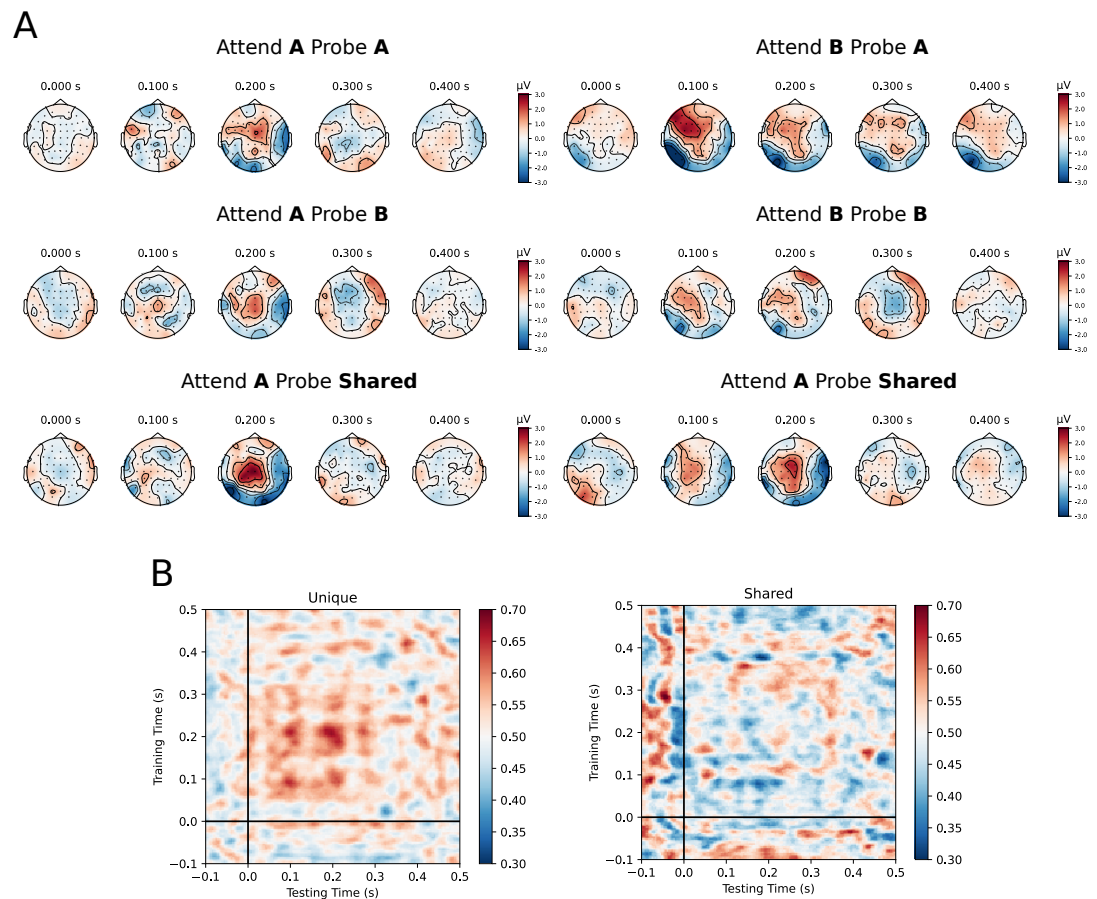

**Figure 3–Figure supplement 3. (A)** Average topomaps of probe A, probe B, and the shared probe were plotted for different attentional conditions. Linear classifiers were trained at each time on the signals from all 64 channels (topomaps) in order to decode the focus of attention. At the subject level, the trained classifier tried to capture the differences in the topomap patterns caused by the attention. **(B)** The classifier scores demonstrated the robustness of the effect for the given subject across all trials. For the unique probe (left), the performance of the classifiers was above chance, which means that there was a consistent difference, i.e., a difference between "Attend A Probe A" and "Attend B Probe A" in topomap patterns across all trials. Conversely, the shared probe scores suggest that the difference between attentional conditions was not robust since it was not linearly separable.

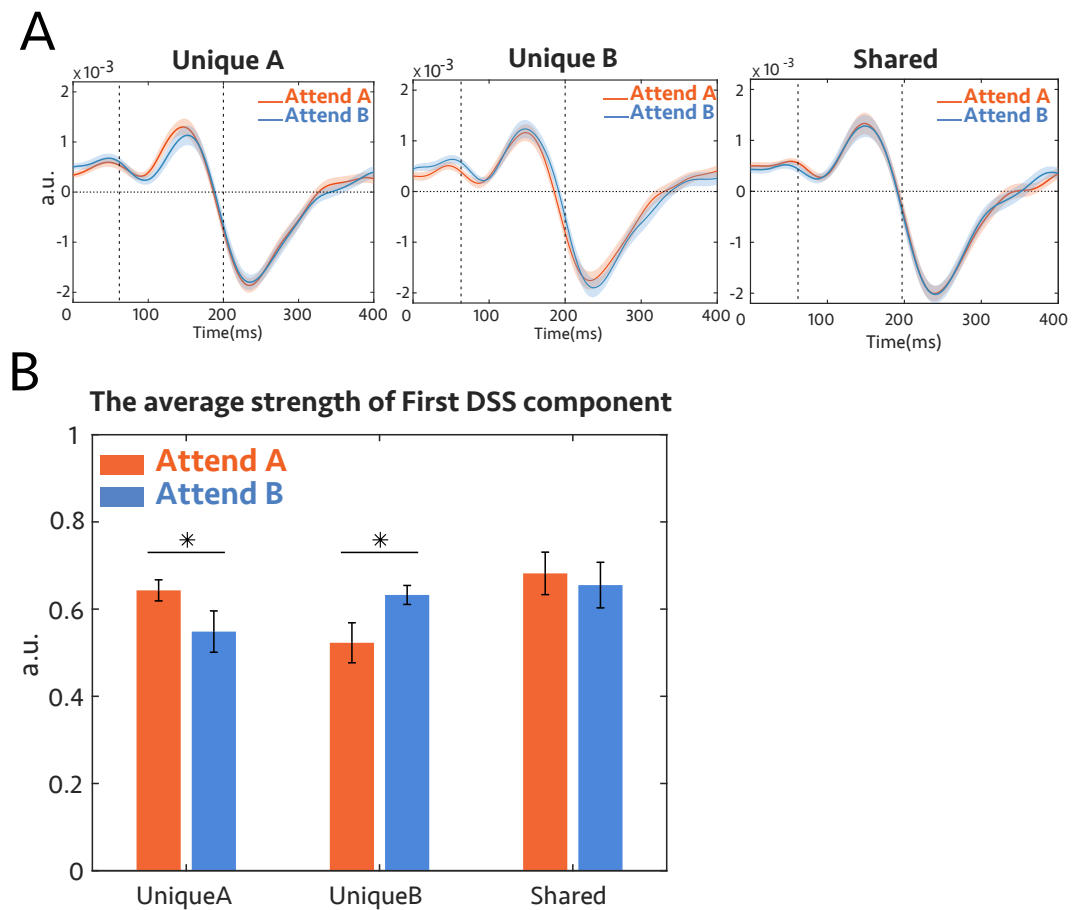

**Figure 3-Figure supplement 4.** Data were submitted to DSS analysis (see Methods section) using the average across trials as a bias filter. The aim was to isolate the most repeatable auditory component by applying a spatial filter. **(A)** Grand average of the most repeatable EEG response to the probe-tone extracted by DSS for each subject; onset of the probe tone is at 0. Left: The response when the probe is at the frequency unique to complex A, middle: when the probe tone is a unique component of complex B, right: The response when the probe tone is a shared component, for attention to tone complex A (orange), and attention to tone complex B (blue). In Figure 3C, we subtracted the orange and blue curves in unique A from the same colors in unique B. **(B)** The average amplitude of the neural response from 60 ms to 200 ms after the probe-tone onset. For the unique frequency channels, the attended condition has significantly higher power than the unattended condition ( $p = 0.03$  for unique A and  $p = 0.01$  for unique B), while the average of the shared channel does not show any modulation with attention ( $p = 0.6$ ).



## # of intensity deviants - Subjects response

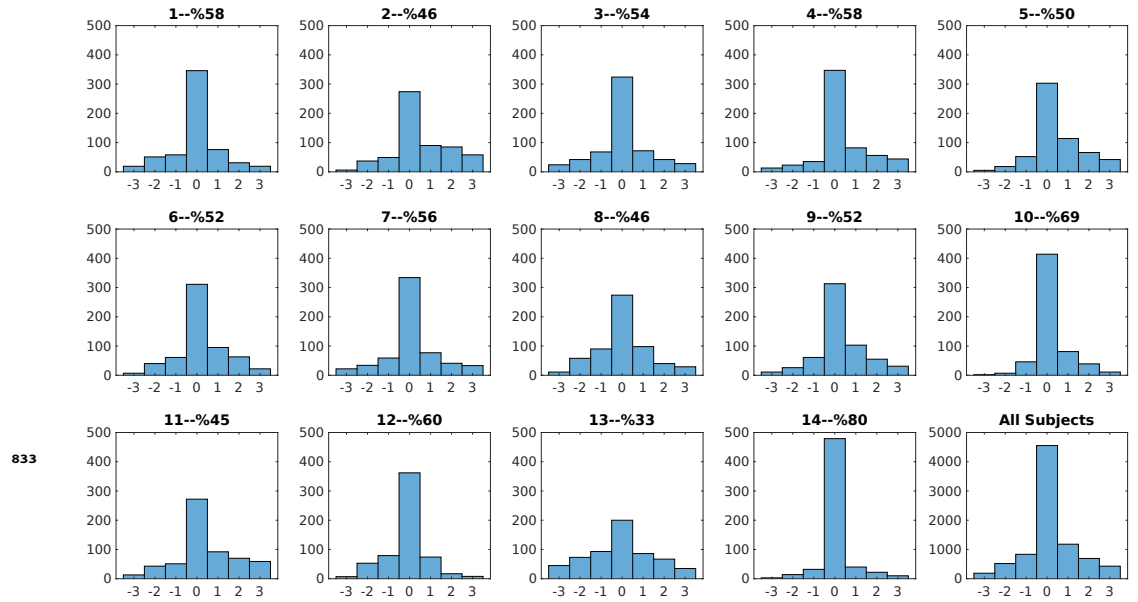

**Figure 4-Figure supplement 1. Behavioral Results.** In this experiment, listeners were instructed to count the number of deviants in the target (attended) noise sequence, which was uniformly distributed between 0-3 (four choices) across trials, and hence, the chance level was at %25. Each subplot shows the histogram of the true number of deviants minus the subject's response. Therefore, in these subplots, "0" means the correct response (hit), positive numbers mean that listeners missed one or some of the deviants, and negatives mean response was larger than the actual number of deviants. Each subplot's title includes the subject's number followed by their percentage of correct answers (hit rate). All the subjects performed above the chance level (chance level = %25).

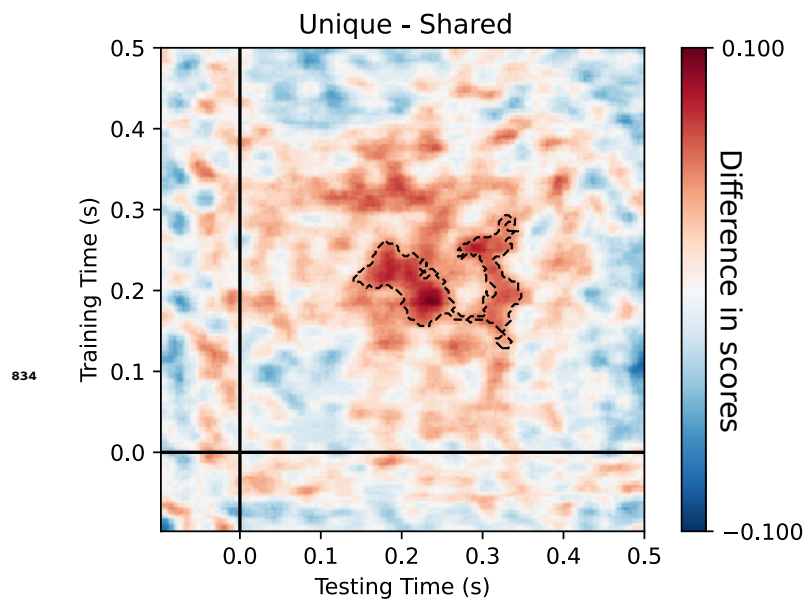

**Figure 4–Figure supplement 2.** Scores show the average difference between decoding scores of Unique and Shared probe-tone for all subjects. The difference was significant for the time region contoured between the dashed lines ( $p = 0.004$ ).

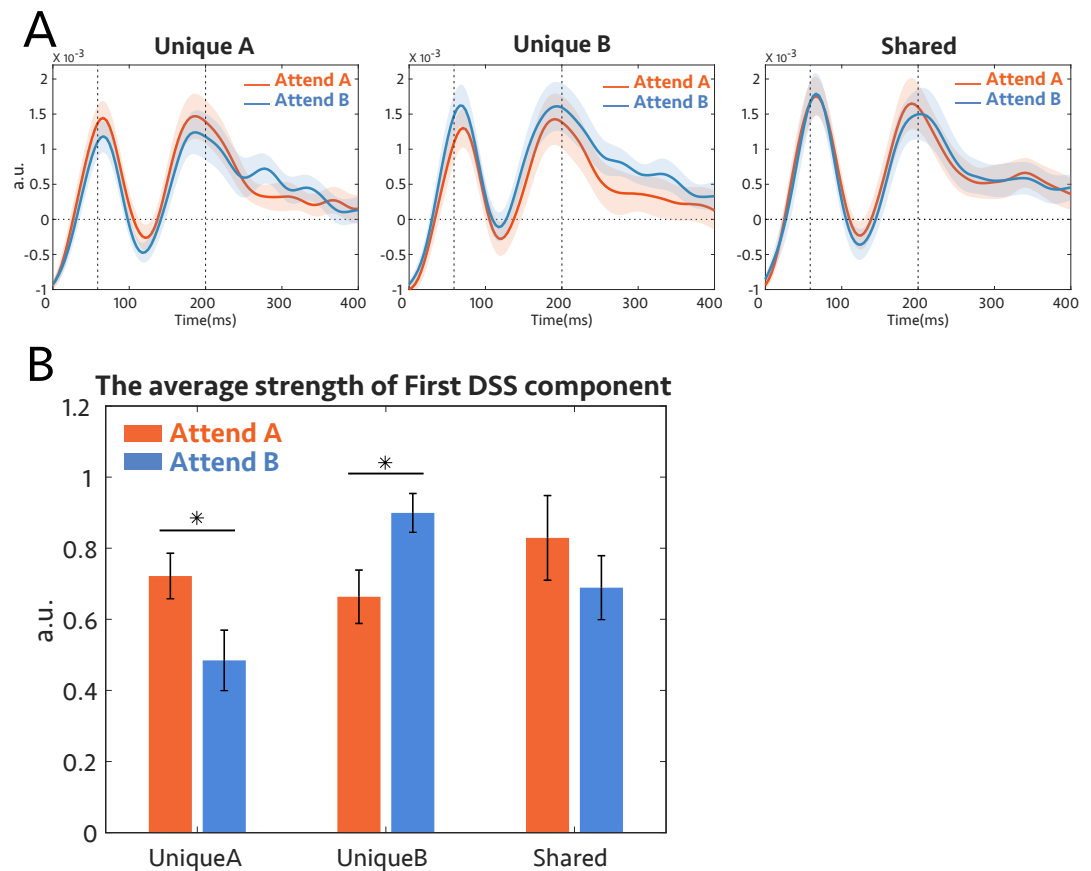

**Figure 4-Figure supplement 3.** Data were submitted to the DSS using the average across trials as a bias filter. The aim was to isolate the most repeatable auditory component by applying a spatial filter. **(A)** Grand Average of the most repeatable EEG response to the probe-tone extracted by DSS for each subject; onset of the probe tone is at 0. Left: The response when the probe was centered at the unique A frequency channels. Middle: The response to the probe-tone unique to complex B. Right: The response when the probe tone was a shared component, under attend to tone complex A (orange) and attend to tone complex B (blue), the curves are comparable. In **Figure 4C**, we subtracted the orange and blue curves in unique A from the same colors in unique B. **(B)** The average strength of the neural response of the first DSS component from 60 ms to 200 ms after the probe-tone onset. For the unique frequency channels, the attended condition had significantly higher power than the unattended condition ( $p = 0.04$  for unique A and  $p = 0.01$  for unique B), while the *mean* of the shared channel did not show any modulation with attention ( $p = 0.24$ ).

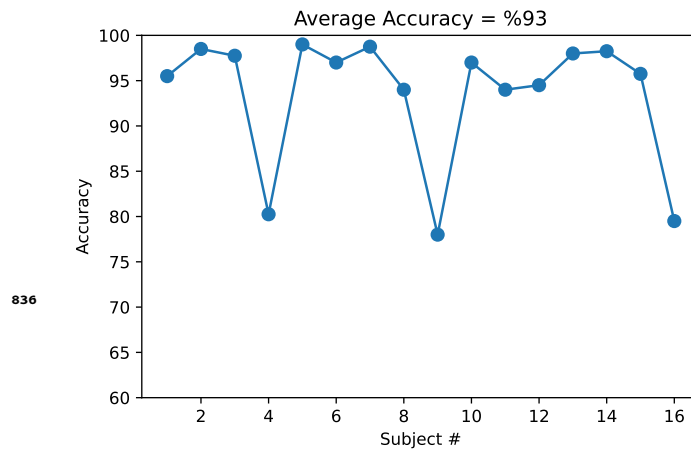

**Figure 5-Figure supplement 1. Behavioral Results.** In this experiment, listeners were instructed to report the number or the color of the attended speaker. Each point shows the accuracy for each subject.

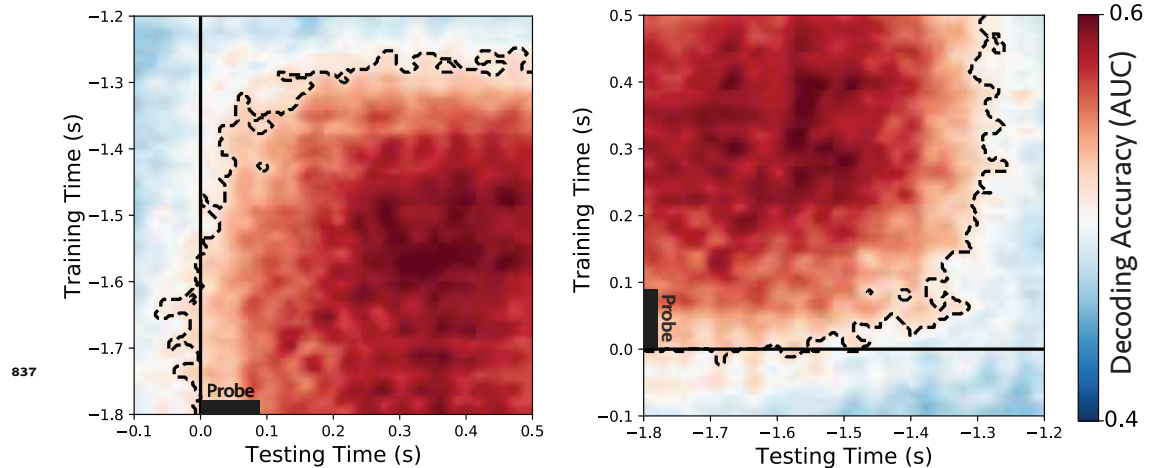

**Figure 5-Figure supplement 2. Generalizing decoders across time** Classifiers trained and tested separately at each time instant in two other 600 ms time windows. *Left:* trained at the beginning of the speech (-1.8 sec to -1.2 sec) and tested during the probe-tone (-100ms to 500ms). *Middle:* trained during the probe time window (-0.1 sec to 0.5 sec) and tested during the beginning of the speech (-1.8 sec to -1.2 sec). These results suggest that the modulatory effect of attention is generalizable across times during speech and probe-tone.
